# Supplementary material
Source: publisher figshare collection journal article supplement (https://acs.figshare.com/ndownloader/files/4006561)
Supplement: Supplementary file 1 [file 4006561]

  
data_4 
  
_audit_creation_method            SHELXL-97 
_chemical_name_systematic 
; 
 ? 
; 
_chemical_name_common             ? 
_chemical_melting_point           ? 
_chemical_formula_moiety          ? 
_chemical_formula_sum 
 'C76 H83 N8 P2 Sc' 
_chemical_formula_weight          1215.40 
  
loop_ 
 _atom_type_symbol 
 _atom_type_description 
 _atom_type_scat_dispersion_real 
 _atom_type_scat_dispersion_imag 
 _atom_type_scat_source 
 'C'  'C'   0.0033   0.0016 
 'International Tables Vol C Tables 4.2.6.8 and 6.1.1.4' 
 'H'  'H'   0.0000   0.0000 
 'International Tables Vol C Tables 4.2.6.8 and 6.1.1.4' 
 'N'  'N'   0.0061   0.0033 
 'International Tables Vol C Tables 4.2.6.8 and 6.1.1.4' 
 'P'  'P'   0.1023   0.0942 
 'International Tables Vol C Tables 4.2.6.8 and 6.1.1.4' 
 'Sc'  'Sc'   0.2519   0.3716 
 'International Tables Vol C Tables 4.2.6.8 and 6.1.1.4' 
  
_symmetry_cell_setting            Monoclinic 
_symmetry_space_group_name_H-M    P2(1)/c 
  
loop_ 
 _symmetry_equiv_pos_as_xyz 
 'x, y, z' 
 '-x, y+1/2, -z+1/2' 
 '-x, -y, -z' 
 'x, -y-1/2, z-1/2' 
  
_cell_length_a                    13.9704(13) 
_cell_length_b                    18.0085(17) 
_cell_length_c                    26.947(3) 
_cell_angle_alpha                 90.00 
_cell_angle_beta                  97.053(2) 
_cell_angle_gamma                 90.00 
_cell_volume                      6728.2(11) 
_cell_formula_units_Z             4 
_cell_measurement_temperature     273(2) 
_cell_measurement_reflns_used     ? 
_cell_measurement_theta_min       ? 
_cell_measurement_theta_max       ? 
  
_exptl_crystal_description        ? 
_exptl_crystal_colour             ? 
_exptl_crystal_size_max           0.24 
_exptl_crystal_size_mid           0.17 
_exptl_crystal_size_min           0.11 
_exptl_crystal_density_meas       ? 
_exptl_crystal_density_diffrn     1.200 
_exptl_crystal_density_method     'not measured' 
_exptl_crystal_F_000              2584 
_exptl_absorpt_coefficient_mu     0.206 
_exptl_absorpt_correction_type    multi-scan 
_exptl_absorpt_correction_T_min   0.9523 
_exptl_absorpt_correction_T_max   0.9777 
_exptl_absorpt_process_details    ? 
  
_exptl_special_details 
; 
 ? 
; 
  
_diffrn_ambient_temperature       273(2) 
_diffrn_radiation_wavelength      0.71073 
_diffrn_radiation_type            MoK\a 
_diffrn_radiation_source          'fine-focus sealed tube' 
_diffrn_radiation_monochromator   graphite 
_diffrn_measurement_device_type   'CCD area detector' 
_diffrn_measurement_method        'phi and omega scans' 
_diffrn_detector_area_resol_mean  ? 
_diffrn_standards_number          ? 
_diffrn_standards_interval_count  ? 
_diffrn_standards_interval_time   ? 
_diffrn_standards_decay_%         ? 
_diffrn_reflns_number             30203 
_diffrn_reflns_av_R_equivalents   0.0573 
_diffrn_reflns_av_sigmaI/netI     0.0842 
_diffrn_reflns_limit_h_min        -16 
_diffrn_reflns_limit_h_max        13 
_diffrn_reflns_limit_k_min        -21 
_diffrn_reflns_limit_k_max        20 
_diffrn_reflns_limit_l_min        -18 
_diffrn_reflns_limit_l_max        32 
_diffrn_reflns_theta_min          1.36 
_diffrn_reflns_theta_max          25.52 
_reflns_number_total              12384 
_reflns_number_gt                 7596 
_reflns_threshold_expression      >2sigma(I) 
  
_computing_data_collection        'Bruker SMART' 
_computing_cell_refinement        'Bruker SMART' 
_computing_data_reduction         'Bruker SAINT' 
_computing_structure_solution     'SHELXS-97 (Sheldrick, 1990)' 
_computing_structure_refinement   'SHELXL-97 (Sheldrick, 1997)' 
_computing_molecular_graphics     'Bruker SHELXTL' 
_computing_publication_material   'Bruker SHELXTL' 
  
_refine_special_details 
; 
 Refinement of F^2^ against ALL reflections.  The weighted R-factor wR and 
 goodness of fit S are based on F^2^, conventional R-factors R are based 
 on F, with F set to zero for negative F^2^. The threshold expression of 
 F^2^ > 2sigma(F^2^) is used only for calculating R-factors(gt) etc. and is 
 not relevant to the choice of reflections for refinement.  R-factors based 
 on F^2^ are statistically about twice as large as those based on F, and R- 
 factors based on ALL data will be even larger. 
; 
  
_refine_ls_structure_factor_coef  Fsqd 
_refine_ls_matrix_type            full 
_refine_ls_weighting_scheme       calc 
_refine_ls_weighting_details 
 'calc w=1/[\s^2^(Fo^2^)+(0.1277P)^2^+0.0000P] where P=(Fo^2^+2Fc^2^)/3' 
_atom_sites_solution_primary      direct 
_atom_sites_solution_secondary    difmap 
_atom_sites_solution_hydrogens    geom 
_refine_ls_hydrogen_treatment     constr 
_refine_ls_extinction_method      none 
_refine_ls_extinction_coef        ? 
_refine_ls_number_reflns          12384 
_refine_ls_number_parameters      724 
_refine_ls_number_restraints      6 
_refine_ls_R_factor_all           0.1129 
_refine_ls_R_factor_gt            0.0688 
_refine_ls_wR_factor_ref          0.2300 
_refine_ls_wR_factor_gt           0.1936 
_refine_ls_goodness_of_fit_ref    1.040 
_refine_ls_restrained_S_all       1.051 
_refine_ls_shift/su_max           0.017 
_refine_ls_shift/su_mean          0.002 
  
loop_ 
 _atom_site_label 
 _atom_site_type_symbol 
 _atom_site_fract_x 
 _atom_site_fract_y 
 _atom_site_fract_z 
 _atom_site_U_iso_or_equiv 
 _atom_site_adp_type 
 _atom_site_occupancy 
 _atom_site_symmetry_multiplicity 
 _atom_site_calc_flag 
 _atom_site_refinement_flags 
 _atom_site_disorder_assembly 
 _atom_site_disorder_group 
Sc1 Sc 0.31854(5) 0.19518(3) 0.13327(2) 0.0313(2) Uani 1 1 d . . . 
P2 P 0.29476(7) 0.18455(5) 0.02021(3) 0.0339(2) Uani 1 1 d . . . 
N2 N 0.2174(2) 0.30067(15) 0.11573(11) 0.0382(7) Uani 1 1 d . . . 
N5 N 0.4288(2) 0.28542(15) 0.16476(11) 0.0365(7) Uani 1 1 d . . . 
N6 N 0.2583(2) 0.15218(15) 0.18370(10) 0.0364(7) Uani 1 1 d . . . 
N4 N 0.4642(2) 0.12649(16) 0.15065(11) 0.0396(7) Uani 1 1 d . . . 
C13 C 0.1814(3) 0.1831(2) -0.01973(13) 0.0377(8) Uani 1 1 d . . . 
C36 C 0.2738(3) 0.04708(19) 0.05642(13) 0.0369(8) Uani 1 1 d . . . 
C31 C 0.2747(3) 0.0025(2) 0.09799(14) 0.0402(9) Uani 1 1 d . . . 
H31 H 0.2895 0.0233 0.1296 0.048 Uiso 1 1 calc R . . 
C19 C 0.3878(3) 0.1740(2) -0.01975(12) 0.0368(8) Uani 1 1 d . . . 
C30 C 0.1538(3) 0.3368(2) 0.14412(13) 0.0407(9) Uani 1 1 d . . . 
C60 C 0.4192(3) 0.3284(2) 0.20448(13) 0.0409(9) Uani 1 1 d . . . 
H60 H 0.3625 0.3242 0.2191 0.049 Uiso 1 1 calc R . . 
C58 C 0.5722(3) 0.38778(19) 0.20418(14) 0.0424(9) Uani 1 1 d . . . 
C56 C 0.5104(3) 0.2960(2) 0.14433(14) 0.0432(9) Uani 1 1 d . . . 
H56 H 0.5191 0.2681 0.1162 0.052 Uiso 1 1 calc R . . 
C37 C 0.2020(3) 0.13186(19) 0.21893(15) 0.0427(9) Uani 1 1 d . . . 
C42 C 0.1120(3) 0.0946(2) 0.20689(17) 0.0514(11) Uani 1 1 d . . . 
N8 N 0.6426(3) 0.43516(19) 0.22301(14) 0.0588(10) Uani 1 1 d . . . 
N7 N 0.7099(3) -0.0014(2) 0.19684(17) 0.0753(12) Uani 1 1 d . . . 
C59 C 0.4865(3) 0.3778(2) 0.22494(14) 0.0451(9) Uani 1 1 d . . . 
H59 H 0.4752 0.4051 0.2530 0.054 Uiso 1 1 calc R . . 
C26 C 0.0734(3) 0.3369(2) 0.21806(17) 0.0583(11) Uani 1 1 d . . . 
H26 H 0.0640 0.3145 0.2482 0.070 Uiso 1 1 calc R . . 
C57 C 0.5816(3) 0.3445(2) 0.16146(15) 0.0471(10) Uani 1 1 d . . . 
H57 H 0.6362 0.3491 0.1451 0.056 Uiso 1 1 calc R . . 
C1 C 0.1665(3) 0.3585(2) 0.01721(14) 0.0496(10) Uani 1 1 d . . . 
C51 C 0.6306(3) 0.0405(2) 0.18161(18) 0.0536(11) Uani 1 1 d . . . 
C25 C 0.1379(3) 0.3069(2) 0.18937(15) 0.0464(10) Uani 1 1 d . . . 
H25 H 0.1722 0.2647 0.2009 0.056 Uiso 1 1 calc R . . 
C49 C 0.5061(3) 0.0831(2) 0.11995(16) 0.0528(11) Uani 1 1 d . . . 
H49 H 0.4785 0.0815 0.0868 0.063 Uiso 1 1 calc R . . 
C35 C 0.2514(3) 0.0133(2) 0.00924(15) 0.0470(10) Uani 1 1 d . . . 
H35 H 0.2505 0.0418 -0.0196 0.056 Uiso 1 1 calc R . . 
C18 C 0.1708(3) 0.2078(2) -0.06852(14) 0.0534(11) Uani 1 1 d . . . 
H18 H 0.2235 0.2277 -0.0819 0.064 Uiso 1 1 calc R . . 
C20 C 0.4401(3) 0.1091(2) -0.02205(14) 0.0496(10) Uani 1 1 d . . . 
H20 H 0.4258 0.0680 -0.0034 0.060 Uiso 1 1 calc R . . 
C14 C 0.1025(3) 0.1547(2) -0.00005(17) 0.0548(11) Uani 1 1 d . . . 
H14 H 0.1084 0.1391 0.0331 0.066 Uiso 1 1 calc R . . 
C21 C 0.5138(3) 0.1051(3) -0.05216(16) 0.0570(11) Uani 1 1 d . . . 
H21 H 0.5500 0.0619 -0.0528 0.068 Uiso 1 1 calc R . . 
C29 C 0.1026(4) 0.4013(3) 0.12932(16) 0.0672(14) Uani 1 1 d . . . 
H29 H 0.1118 0.4242 0.0993 0.081 Uiso 1 1 calc R . . 
C24 C 0.4119(3) 0.2348(2) -0.04746(15) 0.0511(10) Uani 1 1 d . . . 
H24 H 0.3798 0.2797 -0.0450 0.061 Uiso 1 1 calc R . . 
C27 C 0.0223(3) 0.3997(3) 0.20271(19) 0.0642(13) Uani 1 1 d . . . 
H27 H -0.0223 0.4199 0.2218 0.077 Uiso 1 1 calc R . . 
C50 C 0.5861(3) 0.0407(2) 0.13280(19) 0.0653(13) Uani 1 1 d . . . 
H50 H 0.6109 0.0118 0.1087 0.078 Uiso 1 1 calc R . . 
C38 C 0.2295(3) 0.1496(2) 0.27109(15) 0.0519(11) Uani 1 1 d . . . 
C32 C 0.2540(3) -0.0722(2) 0.09373(16) 0.0491(10) Uani 1 1 d . . . 
H32 H 0.2548 -0.1010 0.1224 0.059 Uiso 1 1 calc R . . 
C12 C 0.4231(4) 0.4060(3) 0.05079(19) 0.0705(14) Uani 1 1 d . . . 
H12 H 0.4330 0.3679 0.0286 0.085 Uiso 1 1 calc R . . 
C41 C 0.0562(4) 0.0801(2) 0.2451(2) 0.0733(15) Uani 1 1 d . . . 
H41 H -0.0033 0.0571 0.2371 0.088 Uiso 1 1 calc R . . 
C6 C 0.1928(4) 0.4028(2) -0.02171(16) 0.0659(13) Uani 1 1 d . . . 
H6 H 0.2563 0.4183 -0.0218 0.079 Uiso 1 1 calc R . . 
C16 C 0.0057(4) 0.1747(3) -0.0780(2) 0.0739(15) Uani 1 1 d . . . 
H16 H -0.0538 0.1720 -0.0977 0.089 Uiso 1 1 calc R . . 
C53 C 0.5092(3) 0.1267(2) 0.19732(15) 0.0570(11) Uani 1 1 d . . . 
H53 H 0.4840 0.1572 0.2204 0.068 Uiso 1 1 calc R . . 
C34 C 0.2308(3) -0.0613(2) 0.00553(17) 0.0546(11) Uani 1 1 d . . . 
H34 H 0.2156 -0.0827 -0.0259 0.066 Uiso 1 1 calc R . . 
C52 C 0.5889(3) 0.0861(3) 0.21402(17) 0.0647(13) Uani 1 1 d . . . 
H52 H 0.6152 0.0891 0.2474 0.078 Uiso 1 1 calc R . . 
C3 C 0.0030(4) 0.3565(3) -0.02194(18) 0.0752(15) Uani 1 1 d . . . 
H3 H -0.0607 0.3415 -0.0219 0.090 Uiso 1 1 calc R . . 
C43 C 0.3232(3) 0.1874(2) 0.28616(15) 0.0561(12) Uani 1 1 d . . . 
H43 H 0.3532 0.1959 0.2557 0.067 Uiso 1 1 calc R . . 
C33 C 0.2322(3) -0.1047(2) 0.04767(18) 0.0541(11) Uani 1 1 d . . . 
H33 H 0.2187 -0.1552 0.0450 0.065 Uiso 1 1 calc R . . 
C23 C 0.4827(3) 0.2291(3) -0.07838(17) 0.0643(13) Uani 1 1 d . . . 
H23 H 0.4966 0.2694 -0.0979 0.077 Uiso 1 1 calc R . . 
C2 C 0.0728(3) 0.3350(2) 0.01633(15) 0.0553(11) Uani 1 1 d . . . 
H2 H 0.0561 0.3044 0.0417 0.066 Uiso 1 1 calc R . . 
C17 C 0.0823(4) 0.2034(3) -0.09773(17) 0.0657(13) Uani 1 1 d . . . 
H17 H 0.0756 0.2201 -0.1306 0.079 Uiso 1 1 calc R . . 
C40 C 0.0848(4) 0.0980(3) 0.2942(2) 0.0792(17) Uani 1 1 d . . . 
H40 H 0.0461 0.0860 0.3188 0.095 Uiso 1 1 calc R . . 
C46 C 0.0775(3) 0.0778(3) 0.1539(2) 0.0690(14) Uani 1 1 d . . . 
H46 H 0.1338 0.0816 0.1356 0.083 Uiso 1 1 calc R . . 
C39 C 0.1697(4) 0.1334(3) 0.30644(19) 0.0690(14) Uani 1 1 d . . . 
H39 H 0.1881 0.1470 0.3395 0.083 Uiso 1 1 calc R . . 
C22 C 0.5331(3) 0.1639(3) -0.08053(17) 0.0640(13) Uani 1 1 d . . . 
H22 H 0.5808 0.1601 -0.1016 0.077 Uiso 1 1 calc R . . 
C28 C 0.0387(4) 0.4315(3) 0.15882(19) 0.0744(15) Uani 1 1 d . . . 
H28 H 0.0059 0.4748 0.1484 0.089 Uiso 1 1 calc R . . 
C7 C 0.3435(4) 0.4042(2) 0.07553(15) 0.0556(11) Uani 1 1 d . . . 
C61 C 0.7311(4) 0.4429(3) 0.2004(2) 0.0825(16) Uani 1 1 d . . . 
H61A H 0.7624 0.3955 0.2000 0.124 Uiso 1 1 calc R . . 
H61B H 0.7730 0.4775 0.2195 0.124 Uiso 1 1 calc R . . 
H61C H 0.7163 0.4608 0.1668 0.124 Uiso 1 1 calc R . . 
C45 C 0.3109(4) 0.2632(3) 0.31014(17) 0.0714(14) Uani 1 1 d . . . 
H45A H 0.2705 0.2940 0.2873 0.107 Uiso 1 1 calc R . . 
H45B H 0.3729 0.2862 0.3180 0.107 Uiso 1 1 calc R . . 
H45C H 0.2815 0.2568 0.3403 0.107 Uiso 1 1 calc R . . 
C11 C 0.4900(4) 0.4637(3) 0.0581(2) 0.0869(17) Uani 1 1 d . . . 
H11 H 0.5443 0.4642 0.0413 0.104 Uiso 1 1 calc R . . 
C10 C 0.4744(6) 0.5191(3) 0.0902(2) 0.106(2) Uani 1 1 d . . . 
H10 H 0.5171 0.5588 0.0944 0.128 Uiso 1 1 calc R . . 
C44 C 0.3917(4) 0.1384(3) 0.32040(19) 0.0810(16) Uani 1 1 d . . . 
H44A H 0.3658 0.1308 0.3514 0.122 Uiso 1 1 calc R . . 
H44B H 0.4534 0.1622 0.3268 0.122 Uiso 1 1 calc R . . 
H44C H 0.3989 0.0913 0.3045 0.122 Uiso 1 1 calc R . . 
C62 C 0.6383(4) 0.4702(3) 0.27082(18) 0.0825(16) Uani 1 1 d . . . 
H62A H 0.5787 0.4968 0.2702 0.124 Uiso 1 1 calc R . . 
H62B H 0.6913 0.5041 0.2776 0.124 Uiso 1 1 calc R . . 
H62C H 0.6421 0.4330 0.2965 0.124 Uiso 1 1 calc R . . 
C4 C 0.0285(5) 0.4001(3) -0.0600(2) 0.0869(18) Uani 1 1 d . . . 
H4 H -0.0182 0.4141 -0.0859 0.104 Uiso 1 1 calc R . . 
C5 C 0.1218(5) 0.4232(3) -0.06036(19) 0.0849(18) Uani 1 1 d . . . 
H5 H 0.1380 0.4526 -0.0865 0.102 Uiso 1 1 calc R . . 
C54 C 0.7537(4) -0.0452(3) 0.1602(3) 0.101(2) Uani 1 1 d . . . 
H54A H 0.7081 -0.0813 0.1455 0.151 Uiso 1 1 calc R . . 
H54B H 0.8098 -0.0702 0.1764 0.151 Uiso 1 1 calc R . . 
H54C H 0.7720 -0.0131 0.1346 0.151 Uiso 1 1 calc R . . 
C15 C 0.0144(3) 0.1494(3) -0.0296(2) 0.0724(14) Uani 1 1 d . . . 
H15 H -0.0385 0.1289 -0.0167 0.087 Uiso 1 1 calc R . . 
C55 C 0.7538(4) -0.0001(3) 0.2474(2) 0.0973(19) Uani 1 1 d . . . 
H55A H 0.7876 0.0460 0.2539 0.146 Uiso 1 1 calc R . . 
H55B H 0.7984 -0.0407 0.2531 0.146 Uiso 1 1 calc R . . 
H55C H 0.7050 -0.0047 0.2694 0.146 Uiso 1 1 calc R . . 
C9 C 0.3983(6) 0.5173(3) 0.1159(2) 0.111(3) Uani 1 1 d . . . 
H9 H 0.3904 0.5549 0.1387 0.133 Uiso 1 1 calc R . . 
C8 C 0.3311(5) 0.4604(3) 0.10905(18) 0.0885(19) Uani 1 1 d . . . 
H8 H 0.2781 0.4601 0.1269 0.106 Uiso 1 1 calc R . . 
C47 C 0.0371(5) -0.0001(4) 0.1447(3) 0.135(3) Uani 1 1 d . . . 
H47A H 0.0844 -0.0359 0.1579 0.202 Uiso 1 1 calc R . . 
H47B H 0.0212 -0.0079 0.1094 0.202 Uiso 1 1 calc R . . 
H47C H -0.0199 -0.0056 0.1610 0.202 Uiso 1 1 calc R . . 
C48 C 0.0048(4) 0.1359(4) 0.1313(2) 0.101(2) Uani 1 1 d . . . 
H48A H -0.0497 0.1367 0.1498 0.151 Uiso 1 1 calc R . . 
H48B H -0.0162 0.1235 0.0970 0.151 Uiso 1 1 calc R . . 
H48C H 0.0348 0.1840 0.1329 0.151 Uiso 1 1 calc R . . 
N1 N 0.3205(2) 0.26085(15) 0.04899(10) 0.0364(7) Uani 1 1 d . . . 
N3 N 0.2954(2) 0.12338(15) 0.06306(10) 0.0343(7) Uani 1 1 d . . . 
P1 P 0.25808(8) 0.32791(5) 0.06617(3) 0.0402(3) Uani 1 1 d . . . 
C68 C 0.7076(4) 0.2459(3) 0.2797(2) 0.0876(16) Uiso 1 1 d D . . 
H68 H 0.6757 0.2642 0.2499 0.105 Uiso 1 1 calc R . . 
C67 C 0.6604(4) 0.2433(3) 0.3204(2) 0.0872(16) Uiso 1 1 d D . . 
H67 H 0.5968 0.2594 0.3181 0.105 Uiso 1 1 calc R . . 
C64 C 0.8463(5) 0.1974(4) 0.3256(2) 0.107(2) Uiso 1 1 d D . . 
H64 H 0.9102 0.1817 0.3284 0.128 Uiso 1 1 calc R . . 
C63 C 0.8012(5) 0.2225(3) 0.2811(2) 0.0957(18) Uiso 1 1 d D . . 
C75 C 0.6697(6) 0.2717(4) 0.0364(3) 0.116(2) Uiso 1 1 d . . . 
H75 H 0.6150 0.2430 0.0272 0.139 Uiso 1 1 calc R . . 
C66 C 0.7044(5) 0.2175(4) 0.3643(3) 0.117(2) Uiso 1 1 d D . . 
H66 H 0.6721 0.2150 0.3925 0.140 Uiso 1 1 calc R . . 
C71 C 0.8150(6) 0.2990(4) 0.0901(3) 0.124(2) Uiso 1 1 d . . . 
H71 H 0.8611 0.2877 0.1170 0.148 Uiso 1 1 calc R . . 
C65 C 0.7964(6) 0.1957(4) 0.3659(3) 0.130(3) Uiso 1 1 d D . . 
H65 H 0.8278 0.1784 0.3961 0.156 Uiso 1 1 calc R . . 
C70 C 0.7305(6) 0.2508(5) 0.0727(3) 0.131(3) Uiso 1 1 d . . . 
C72 C 0.8162(6) 0.3590(5) 0.0630(3) 0.129(3) Uiso 1 1 d . . . 
H72 H 0.8669 0.3915 0.0723 0.154 Uiso 1 1 calc R . . 
C73 C 0.7490(7) 0.3819(6) 0.0204(3) 0.157(3) Uiso 1 1 d . . . 
H73 H 0.7524 0.4251 0.0018 0.188 Uiso 1 1 calc R . . 
C69 C 0.8489(8) 0.2212(6) 0.2349(4) 0.180(4) Uiso 1 1 d . . . 
H69A H 0.8565 0.1707 0.2247 0.271 Uiso 1 1 calc R . . 
H69B H 0.9111 0.2444 0.2413 0.271 Uiso 1 1 calc R . . 
H69C H 0.8100 0.2478 0.2089 0.271 Uiso 1 1 calc R . . 
C76 C 0.7315(9) 0.1953(7) 0.1033(4) 0.212(5) Uiso 1 1 d . . . 
H76A H 0.6666 0.1787 0.1049 0.317 Uiso 1 1 calc R . . 
H76B H 0.7597 0.2106 0.1360 0.317 Uiso 1 1 calc R . . 
H76C H 0.7688 0.1555 0.0918 0.317 Uiso 1 1 calc R . . 
C74 C 0.6818(8) 0.3298(6) 0.0128(4) 0.171(4) Uiso 1 1 d . . . 
H74 H 0.6360 0.3380 -0.0147 0.205 Uiso 1 1 calc R . . 
  
loop_ 
 _atom_site_aniso_label 
 _atom_site_aniso_U_11 
 _atom_site_aniso_U_22 
 _atom_site_aniso_U_33 
 _atom_site_aniso_U_23 
 _atom_site_aniso_U_13 
 _atom_site_aniso_U_12 
Sc1 0.0335(4) 0.0291(4) 0.0308(4) -0.0009(3) 0.0023(3) 0.0006(3) 
P2 0.0336(5) 0.0365(5) 0.0311(5) -0.0025(4) 0.0022(4) -0.0010(4) 
N2 0.0459(18) 0.0322(16) 0.0357(17) -0.0003(13) 0.0007(14) 0.0080(14) 
N5 0.0362(17) 0.0340(16) 0.0380(17) 0.0003(13) -0.0003(13) -0.0012(14) 
N6 0.0383(17) 0.0329(16) 0.0385(17) 0.0001(13) 0.0062(13) 0.0036(14) 
N4 0.0385(17) 0.0364(16) 0.0431(18) -0.0034(14) 0.0021(14) 0.0022(14) 
C13 0.035(2) 0.040(2) 0.037(2) -0.0045(16) 0.0014(16) 0.0009(16) 
C36 0.034(2) 0.0325(19) 0.044(2) -0.0037(16) 0.0027(16) -0.0006(16) 
C31 0.036(2) 0.039(2) 0.047(2) -0.0019(17) 0.0061(16) -0.0014(17) 
C19 0.034(2) 0.047(2) 0.0291(19) 0.0003(16) 0.0012(15) -0.0004(17) 
C30 0.042(2) 0.036(2) 0.040(2) -0.0117(17) -0.0075(17) 0.0084(17) 
C60 0.042(2) 0.040(2) 0.040(2) -0.0084(17) 0.0048(17) -0.0026(18) 
C58 0.047(2) 0.0318(19) 0.046(2) -0.0029(17) -0.0024(18) -0.0024(18) 
C56 0.047(2) 0.041(2) 0.042(2) -0.0108(17) 0.0064(18) -0.0024(18) 
C37 0.047(2) 0.0276(19) 0.057(2) 0.0053(17) 0.0206(19) 0.0096(17) 
C42 0.045(2) 0.037(2) 0.076(3) 0.001(2) 0.023(2) -0.0001(19) 
N8 0.062(2) 0.050(2) 0.062(2) -0.0106(17) -0.0015(18) -0.0159(19) 
N7 0.052(2) 0.057(2) 0.112(4) 0.000(2) -0.010(2) 0.019(2) 
C59 0.053(2) 0.044(2) 0.039(2) -0.0081(17) 0.0040(18) 0.0013(19) 
C26 0.057(3) 0.056(3) 0.065(3) -0.009(2) 0.019(2) 0.000(2) 
C57 0.042(2) 0.047(2) 0.053(2) -0.0016(19) 0.0108(18) -0.0090(19) 
C1 0.075(3) 0.036(2) 0.036(2) -0.0033(17) -0.003(2) 0.009(2) 
C51 0.038(2) 0.039(2) 0.082(3) 0.001(2) -0.003(2) 0.0054(19) 
C25 0.049(2) 0.037(2) 0.054(3) -0.0001(18) 0.0134(19) 0.0095(18) 
C49 0.045(2) 0.058(3) 0.053(3) -0.018(2) -0.0046(19) 0.009(2) 
C35 0.046(2) 0.042(2) 0.051(2) -0.0099(18) 0.0016(18) -0.0052(19) 
C18 0.051(3) 0.073(3) 0.035(2) -0.005(2) -0.0014(18) 0.000(2) 
C20 0.048(2) 0.056(3) 0.046(2) -0.0080(19) 0.0086(18) 0.001(2) 
C14 0.038(2) 0.060(3) 0.065(3) 0.011(2) 0.001(2) -0.003(2) 
C21 0.050(3) 0.062(3) 0.061(3) -0.005(2) 0.013(2) 0.013(2) 
C29 0.095(4) 0.064(3) 0.038(2) -0.003(2) -0.009(2) 0.036(3) 
C24 0.043(2) 0.060(3) 0.052(3) 0.011(2) 0.0094(19) 0.007(2) 
C27 0.048(3) 0.072(3) 0.072(3) -0.031(3) 0.001(2) 0.018(2) 
C50 0.047(3) 0.060(3) 0.085(4) -0.029(2) -0.005(2) 0.019(2) 
C38 0.073(3) 0.041(2) 0.047(2) 0.0121(18) 0.028(2) 0.018(2) 
C32 0.045(2) 0.037(2) 0.066(3) 0.0084(19) 0.011(2) 0.0021(18) 
C12 0.079(4) 0.047(3) 0.084(4) 0.000(2) 0.004(3) -0.021(3) 
C41 0.058(3) 0.047(3) 0.121(5) 0.019(3) 0.035(3) 0.002(2) 
C6 0.092(4) 0.050(3) 0.048(3) 0.010(2) -0.018(2) -0.003(3) 
C16 0.052(3) 0.076(3) 0.085(4) -0.008(3) -0.026(3) -0.003(3) 
C53 0.058(3) 0.068(3) 0.044(2) 0.001(2) 0.003(2) 0.027(2) 
C34 0.049(3) 0.049(2) 0.064(3) -0.016(2) -0.001(2) -0.004(2) 
C52 0.062(3) 0.075(3) 0.052(3) 0.010(2) -0.012(2) 0.019(3) 
C3 0.070(3) 0.096(4) 0.056(3) -0.009(3) -0.013(2) 0.019(3) 
C43 0.073(3) 0.060(3) 0.036(2) -0.0014(19) 0.010(2) 0.012(2) 
C33 0.046(2) 0.036(2) 0.080(3) -0.009(2) 0.007(2) -0.0060(19) 
C23 0.052(3) 0.078(3) 0.065(3) 0.028(2) 0.016(2) 0.009(3) 
C2 0.064(3) 0.061(3) 0.040(2) 0.002(2) 0.000(2) 0.016(2) 
C17 0.062(3) 0.087(4) 0.043(3) -0.007(2) -0.012(2) 0.003(3) 
C40 0.089(4) 0.067(3) 0.092(4) 0.029(3) 0.055(3) 0.017(3) 
C46 0.038(2) 0.068(3) 0.104(4) -0.019(3) 0.020(2) -0.008(2) 
C39 0.089(4) 0.059(3) 0.066(3) 0.023(2) 0.037(3) 0.021(3) 
C22 0.053(3) 0.087(4) 0.054(3) 0.008(2) 0.015(2) 0.013(3) 
C28 0.084(4) 0.070(3) 0.063(3) -0.020(3) -0.013(3) 0.047(3) 
C7 0.085(3) 0.034(2) 0.044(2) 0.0105(18) -0.008(2) -0.011(2) 
C61 0.056(3) 0.068(3) 0.123(5) -0.027(3) 0.011(3) -0.031(3) 
C45 0.107(4) 0.063(3) 0.047(3) -0.005(2) 0.019(3) 0.009(3) 
C11 0.094(4) 0.074(4) 0.089(4) 0.009(3) -0.001(3) -0.036(3) 
C10 0.174(7) 0.074(4) 0.063(4) 0.010(3) -0.018(4) -0.060(4) 
C44 0.100(4) 0.069(3) 0.069(3) 0.002(3) -0.010(3) 0.022(3) 
C62 0.111(4) 0.070(3) 0.064(3) -0.023(3) -0.003(3) -0.035(3) 
C4 0.111(5) 0.083(4) 0.056(3) 0.011(3) -0.030(3) 0.019(4) 
C5 0.125(5) 0.066(3) 0.054(3) 0.017(2) -0.023(3) -0.002(3) 
C54 0.058(3) 0.070(4) 0.173(6) 0.001(4) 0.006(4) 0.031(3) 
C15 0.037(3) 0.076(3) 0.102(4) 0.015(3) 0.001(2) -0.009(2) 
C55 0.071(4) 0.097(4) 0.113(5) 0.023(4) -0.031(3) 0.024(3) 
C9 0.198(8) 0.068(4) 0.067(4) -0.023(3) 0.017(4) -0.054(5) 
C8 0.154(6) 0.056(3) 0.058(3) -0.017(2) 0.021(3) -0.036(3) 
C47 0.101(5) 0.099(5) 0.212(8) -0.070(5) 0.051(5) -0.051(4) 
C48 0.080(4) 0.136(5) 0.084(4) -0.026(4) -0.003(3) 0.020(4) 
N1 0.0415(18) 0.0348(16) 0.0320(16) 0.0002(12) 0.0004(13) -0.0030(14) 
N3 0.0350(16) 0.0325(15) 0.0348(16) -0.0025(12) 0.0019(12) -0.0030(13) 
P1 0.0536(6) 0.0314(5) 0.0337(5) 0.0007(4) -0.0024(4) 0.0008(4) 
  
_geom_special_details 
; 
 All esds (except the esd in the dihedral angle between two l.s. planes) 
 are estimated using the full covariance matrix.  The cell esds are taken 
 into account individually in the estimation of esds in distances, angles 
 and torsion angles; correlations between esds in cell parameters are only 
 used when they are defined by crystal symmetry.  An approximate (isotropic) 
 treatment of cell esds is used for estimating esds involving l.s. planes. 
; 
  
loop_ 
 _geom_bond_atom_site_label_1 
 _geom_bond_atom_site_label_2 
 _geom_bond_distance 
 _geom_bond_site_symmetry_2 
 _geom_bond_publ_flag 
Sc1 N6 1.853(3) . ? 
Sc1 N3 2.282(3) . ? 
Sc1 N5 2.326(3) . ? 
Sc1 N4 2.379(3) . ? 
Sc1 N2 2.380(3) . ? 
Sc1 N1 2.564(3) . ? 
P2 N3 1.595(3) . ? 
P2 N1 1.597(3) . ? 
P2 C19 1.797(4) . ? 
P2 C13 1.802(4) . ? 
N2 C30 1.402(4) . ? 
N2 P1 1.592(3) . ? 
N5 C56 1.339(5) . ? 
N5 C60 1.341(4) . ? 
N6 C37 1.356(4) . ? 
N4 C49 1.325(5) . ? 
N4 C53 1.335(5) . ? 
C13 C18 1.379(5) . ? 
C13 C14 1.379(5) . ? 
C36 C31 1.377(5) . ? 
C36 C35 1.409(5) . ? 
C36 N3 1.413(4) . ? 
C31 C32 1.378(5) . ? 
C19 C20 1.384(5) . ? 
C19 C24 1.390(5) . ? 
C30 C25 1.376(5) . ? 
C30 C29 1.396(5) . ? 
C60 C59 1.361(5) . ? 
C58 N8 1.353(5) . ? 
C58 C59 1.395(5) . ? 
C58 C57 1.409(5) . ? 
C56 C57 1.361(5) . ? 
C37 C42 1.427(6) . ? 
C37 C38 1.446(6) . ? 
C42 C41 1.391(6) . ? 
C42 C46 1.480(6) . ? 
N8 C62 1.442(5) . ? 
N8 C61 1.449(6) . ? 
N7 C51 1.362(5) . ? 
N7 C55 1.425(6) . ? 
N7 C54 1.456(7) . ? 
C26 C25 1.369(5) . ? 
C26 C27 1.374(6) . ? 
C1 C2 1.373(6) . ? 
C1 C6 1.402(6) . ? 
C1 P1 1.808(4) . ? 
C51 C52 1.379(6) . ? 
C51 C50 1.384(6) . ? 
C49 C50 1.364(6) . ? 
C35 C34 1.376(5) . ? 
C18 C17 1.384(6) . ? 
C20 C21 1.389(6) . ? 
C14 C15 1.384(6) . ? 
C21 C22 1.352(6) . ? 
C29 C28 1.378(6) . ? 
C24 C23 1.374(6) . ? 
C27 C28 1.358(7) . ? 
C38 C39 1.373(6) . ? 
C38 C43 1.487(6) . ? 
C32 C33 1.372(6) . ? 
C12 C7 1.366(7) . ? 
C12 C11 1.396(6) . ? 
C41 C40 1.372(7) . ? 
C6 C5 1.396(7) . ? 
C16 C17 1.355(7) . ? 
C16 C15 1.375(7) . ? 
C53 C52 1.361(6) . ? 
C34 C33 1.377(6) . ? 
C3 C4 1.374(8) . ? 
C3 C2 1.385(6) . ? 
C43 C44 1.526(6) . ? 
C43 C45 1.528(6) . ? 
C23 C22 1.374(6) . ? 
C40 C39 1.351(7) . ? 
C46 C47 1.522(7) . ? 
C46 C48 1.531(7) . ? 
C7 C8 1.382(6) . ? 
C7 P1 1.816(4) . ? 
C11 C10 1.354(8) . ? 
C10 C9 1.339(9) . ? 
C4 C5 1.369(8) . ? 
C9 C8 1.387(8) . ? 
N1 P1 1.591(3) . ? 
C68 C67 1.346(7) . ? 
C68 C63 1.370(7) . ? 
C67 C66 1.348(8) . ? 
C64 C65 1.360(8) . ? 
C64 C63 1.363(8) . ? 
C63 C69 1.481(10) . ? 
C75 C74 1.246(11) . ? 
C75 C70 1.271(10) . ? 
C66 C65 1.340(9) . ? 
C71 C72 1.305(9) . ? 
C71 C70 1.494(10) . ? 
C70 C76 1.295(12) . ? 
C72 C73 1.450(11) . ? 
C73 C74 1.325(12) . ? 
  
loop_ 
 _geom_angle_atom_site_label_1 
 _geom_angle_atom_site_label_2 
 _geom_angle_atom_site_label_3 
 _geom_angle 
 _geom_angle_site_symmetry_1 
 _geom_angle_site_symmetry_3 
 _geom_angle_publ_flag 
N6 Sc1 N3 109.89(12) . . ? 
N6 Sc1 N5 111.36(12) . . ? 
N3 Sc1 N5 135.93(10) . . ? 
N6 Sc1 N4 95.33(12) . . ? 
N3 Sc1 N4 84.23(10) . . ? 
N5 Sc1 N4 77.25(10) . . ? 
N6 Sc1 N2 99.62(12) . . ? 
N3 Sc1 N2 105.50(10) . . ? 
N5 Sc1 N2 82.26(10) . . ? 
N4 Sc1 N2 157.96(11) . . ? 
N6 Sc1 N1 153.82(12) . . ? 
N3 Sc1 N1 62.78(9) . . ? 
N5 Sc1 N1 85.55(10) . . ? 
N4 Sc1 N1 108.20(10) . . ? 
N2 Sc1 N1 61.74(10) . . ? 
N3 P2 N1 105.19(15) . . ? 
N3 P2 C19 114.89(16) . . ? 
N1 P2 C19 104.23(16) . . ? 
N3 P2 C13 110.38(16) . . ? 
N1 P2 C13 115.56(16) . . ? 
C19 P2 C13 106.72(16) . . ? 
C30 N2 P1 129.1(2) . . ? 
C30 N2 Sc1 131.5(2) . . ? 
P1 N2 Sc1 98.51(14) . . ? 
C56 N5 C60 114.8(3) . . ? 
C56 N5 Sc1 120.6(2) . . ? 
C60 N5 Sc1 124.6(2) . . ? 
C37 N6 Sc1 168.8(3) . . ? 
C49 N4 C53 113.4(3) . . ? 
C49 N4 Sc1 128.0(3) . . ? 
C53 N4 Sc1 118.4(2) . . ? 
C18 C13 C14 119.3(4) . . ? 
C18 C13 P2 123.3(3) . . ? 
C14 C13 P2 117.5(3) . . ? 
C31 C36 C35 117.5(3) . . ? 
C31 C36 N3 118.9(3) . . ? 
C35 C36 N3 123.6(3) . . ? 
C36 C31 C32 121.4(4) . . ? 
C20 C19 C24 118.5(3) . . ? 
C20 C19 P2 122.7(3) . . ? 
C24 C19 P2 118.6(3) . . ? 
C25 C30 C29 116.5(4) . . ? 
C25 C30 N2 118.9(3) . . ? 
C29 C30 N2 124.5(4) . . ? 
N5 C60 C59 124.7(4) . . ? 
N8 C58 C59 123.5(4) . . ? 
N8 C58 C57 121.2(4) . . ? 
C59 C58 C57 115.3(3) . . ? 
N5 C56 C57 125.2(3) . . ? 
N6 C37 C42 122.6(4) . . ? 
N6 C37 C38 120.9(4) . . ? 
C42 C37 C38 116.5(3) . . ? 
C41 C42 C37 118.6(4) . . ? 
C41 C42 C46 122.0(4) . . ? 
C37 C42 C46 119.2(4) . . ? 
C58 N8 C62 120.2(4) . . ? 
C58 N8 C61 121.4(4) . . ? 
C62 N8 C61 117.7(4) . . ? 
C51 N7 C55 121.2(4) . . ? 
C51 N7 C54 119.3(4) . . ? 
C55 N7 C54 119.4(4) . . ? 
C60 C59 C58 120.4(3) . . ? 
C25 C26 C27 120.6(4) . . ? 
C56 C57 C58 119.6(4) . . ? 
C2 C1 C6 120.0(4) . . ? 
C2 C1 P1 120.4(3) . . ? 
C6 C1 P1 119.5(4) . . ? 
N7 C51 C52 122.1(4) . . ? 
N7 C51 C50 122.8(4) . . ? 
C52 C51 C50 115.2(4) . . ? 
C26 C25 C30 122.3(4) . . ? 
N4 C49 C50 125.7(4) . . ? 
C34 C35 C36 120.5(4) . . ? 
C13 C18 C17 120.5(4) . . ? 
C19 C20 C21 120.2(4) . . ? 
C13 C14 C15 120.1(4) . . ? 
C22 C21 C20 120.2(4) . . ? 
C28 C29 C30 120.5(4) . . ? 
C23 C24 C19 120.4(4) . . ? 
C28 C27 C26 118.2(4) . . ? 
C49 C50 C51 120.0(4) . . ? 
C39 C38 C37 121.0(5) . . ? 
C39 C38 C43 119.8(4) . . ? 
C37 C38 C43 119.1(3) . . ? 
C33 C32 C31 120.9(4) . . ? 
C7 C12 C11 121.3(5) . . ? 
C40 C41 C42 123.1(5) . . ? 
C5 C6 C1 118.7(5) . . ? 
C17 C16 C15 121.1(4) . . ? 
N4 C53 C52 125.5(4) . . ? 
C35 C34 C33 120.9(4) . . ? 
C53 C52 C51 120.2(4) . . ? 
C4 C3 C2 119.5(5) . . ? 
C38 C43 C44 111.4(4) . . ? 
C38 C43 C45 112.6(4) . . ? 
C44 C43 C45 110.8(4) . . ? 
C32 C33 C34 118.9(4) . . ? 
C24 C23 C22 120.0(4) . . ? 
C1 C2 C3 120.6(4) . . ? 
C16 C17 C18 119.5(4) . . ? 
C39 C40 C41 119.3(5) . . ? 
C42 C46 C47 114.6(5) . . ? 
C42 C46 C48 111.4(4) . . ? 
C47 C46 C48 110.5(5) . . ? 
C40 C39 C38 121.4(5) . . ? 
C21 C22 C23 120.4(4) . . ? 
C27 C28 C29 121.8(4) . . ? 
C12 C7 C8 118.5(5) . . ? 
C12 C7 P1 120.7(3) . . ? 
C8 C7 P1 120.8(4) . . ? 
C10 C11 C12 118.8(6) . . ? 
C9 C10 C11 120.9(6) . . ? 
C5 C4 C3 120.9(5) . . ? 
C4 C5 C6 120.3(5) . . ? 
C16 C15 C14 119.5(4) . . ? 
C10 C9 C8 121.1(6) . . ? 
C7 C8 C9 119.4(6) . . ? 
P1 N1 P2 134.1(2) . . ? 
P1 N1 Sc1 91.52(12) . . ? 
P2 N1 Sc1 90.40(12) . . ? 
C36 N3 P2 126.7(2) . . ? 
C36 N3 Sc1 131.5(2) . . ? 
P2 N3 Sc1 101.33(13) . . ? 
N1 P1 N2 105.97(15) . . ? 
N1 P1 C1 112.53(16) . . ? 
N2 P1 C1 114.37(19) . . ? 
N1 P1 C7 103.9(2) . . ? 
N2 P1 C7 114.38(18) . . ? 
C1 P1 C7 105.35(19) . . ? 
C67 C68 C63 121.9(6) . . ? 
C68 C67 C66 120.7(7) . . ? 
C65 C64 C63 118.9(7) . . ? 
C64 C63 C68 117.5(6) . . ? 
C64 C63 C69 121.8(7) . . ? 
C68 C63 C69 120.6(7) . . ? 
C74 C75 C70 121.4(10) . . ? 
C65 C66 C67 117.4(8) . . ? 
C72 C71 C70 111.6(8) . . ? 
C66 C65 C64 123.5(8) . . ? 
C75 C70 C76 132.2(11) . . ? 
C75 C70 C71 119.8(9) . . ? 
C76 C70 C71 107.6(10) . . ? 
C71 C72 C73 128.8(9) . . ? 
C74 C73 C72 107.4(10) . . ? 
C75 C74 C73 130.8(12) . . ? 
  
_diffrn_measured_fraction_theta_max    0.987 
_diffrn_reflns_theta_full              25.52 
_diffrn_measured_fraction_theta_full   0.987 
_refine_diff_density_max    0.693 
_refine_diff_density_min   -0.523 
_refine_diff_density_rms    0.067 

#===========END============= 

data_9 
 
_audit_creation_method            SHELXL-97 
_chemical_name_systematic 
; 
 ? 
; 
_chemical_name_common             ? 
_chemical_melting_point           ? 
_chemical_formula_moiety          ? 
_chemical_formula_sum 
 'C67 H88 N4 P2 Si Y' 
_chemical_formula_weight          1128.35 
 
loop_ 
 _atom_type_symbol 
 _atom_type_description 
 _atom_type_scat_dispersion_real 
 _atom_type_scat_dispersion_imag 
 _atom_type_scat_source 
 'C'  'C'   0.0033   0.0016 
 'International Tables Vol C Tables 4.2.6.8 and 6.1.1.4' 
 'H'  'H'   0.0000   0.0000 
 'International Tables Vol C Tables 4.2.6.8 and 6.1.1.4' 
 'N'  'N'   0.0061   0.0033 
 'International Tables Vol C Tables 4.2.6.8 and 6.1.1.4' 
 'Si'  'Si'   0.0817   0.0704 
 'International Tables Vol C Tables 4.2.6.8 and 6.1.1.4' 
 'P'  'P'   0.1023   0.0942 
 'International Tables Vol C Tables 4.2.6.8 and 6.1.1.4' 
 'Y'  'Y'  -2.7962   3.5667 
 'International Tables Vol C Tables 4.2.6.8 and 6.1.1.4' 
 
_symmetry_cell_setting            monoclinic 
_symmetry_space_group_name_H-M    C2/c
 
loop_ 
 _symmetry_equiv_pos_as_xyz 
 'x, y, z' 
 '-x, y, -z+1/2' 
 'x+1/2, y+1/2, z' 
 '-x+1/2, y+1/2, -z+1/2' 
 '-x, -y, -z' 
 'x, -y, z-1/2' 
 '-x+1/2, -y+1/2, -z' 
 'x+1/2, -y+1/2, z-1/2' 
 
_cell_length_a                    48.821(3) 
_cell_length_b                    14.3262(8) 
_cell_length_c                    19.1490(12) 
_cell_angle_alpha                 90.00 
_cell_angle_beta                  108.7800(10) 
_cell_angle_gamma                 90.00 
_cell_volume                      12680.1(13) 
_cell_formula_units_Z             8 
_cell_measurement_temperature     273(2) 
_cell_measurement_reflns_used     ? 
_cell_measurement_theta_min       ? 
_cell_measurement_theta_max       ? 
 
_exptl_crystal_description        block 
_exptl_crystal_colour             colorless
_exptl_crystal_size_max           0.20 
_exptl_crystal_size_mid           0.18 
_exptl_crystal_size_min           0.15 
_exptl_crystal_density_meas       ? 
_exptl_crystal_density_diffrn     1.182 
_exptl_crystal_density_method     'not measured' 
_exptl_crystal_F_000              4808 
_exptl_absorpt_coefficient_mu     1.031 
_exptl_absorpt_correction_type    multi-scan
_exptl_absorpt_correction_T_min   0.8204 
_exptl_absorpt_correction_T_max   0.8608 
_exptl_absorpt_process_details    ? 
 
_exptl_special_details 
; 
 ? 
; 
 
_diffrn_ambient_temperature       273(2) 
_diffrn_radiation_wavelength      0.71073 
_diffrn_radiation_type            MoK\a 
_diffrn_radiation_source          'fine-focus sealed tube' 
_diffrn_radiation_monochromator   graphite 
_diffrn_measurement_device_type   ? 
_diffrn_measurement_method        ? 
_diffrn_detector_area_resol_mean  ? 
_diffrn_standards_number          ? 
_diffrn_standards_interval_count  ? 
_diffrn_standards_interval_time   ? 
_diffrn_standards_decay_%         ? 
_diffrn_reflns_number             35194 
_diffrn_reflns_av_R_equivalents   0.1101 
_diffrn_reflns_av_sigmaI/netI     0.1370 
_diffrn_reflns_limit_h_min        -57 
_diffrn_reflns_limit_h_max        58 
_diffrn_reflns_limit_k_min        -9 
_diffrn_reflns_limit_k_max        17 
_diffrn_reflns_limit_l_min        -22 
_diffrn_reflns_limit_l_max        22 
_diffrn_reflns_theta_min          1.49 
_diffrn_reflns_theta_max          25.06 
_reflns_number_total              11223 
_reflns_number_gt                 5804 
_reflns_threshold_expression      >2sigma(I) 
 
_computing_data_collection        ? 
_computing_cell_refinement        ? 
_computing_data_reduction         ? 
_computing_structure_solution     'SHELXS-97 (Sheldrick, 1990)' 
_computing_structure_refinement   'SHELXL-97 (Sheldrick, 1997)' 
_computing_molecular_graphics     ? 
_computing_publication_material   ? 
 
_refine_special_details 
; 
 Refinement of F^2^ against ALL reflections.  The weighted R-factor wR and 
 goodness of fit S are based on F^2^, conventional R-factors R are based 
 on F, with F set to zero for negative F^2^. The threshold expression of 
 F^2^ > 2sigma(F^2^) is used only for calculating R-factors(gt) etc. and is 
 not relevant to the choice of reflections for refinement.  R-factors based 
 on F^2^ are statistically about twice as large as those based on F, and R- 
 factors based on ALL data will be even larger. 
; 
 
_refine_ls_structure_factor_coef  Fsqd  
_refine_ls_matrix_type            full 
_refine_ls_weighting_scheme       calc  
_refine_ls_weighting_details 
 'calc w=1/[\s^2^(Fo^2^)+(0.0913P)^2^+0.0000P] where P=(Fo^2^+2Fc^2^)/3' 
_atom_sites_solution_primary      direct 
_atom_sites_solution_secondary    difmap 
_atom_sites_solution_hydrogens    geom 
_refine_ls_hydrogen_treatment     mixed 
_refine_ls_extinction_method      none 
_refine_ls_extinction_coef        ? 
_refine_ls_number_reflns          11223 
_refine_ls_number_parameters      680 
_refine_ls_number_restraints      0 
_refine_ls_R_factor_all           0.1577 
_refine_ls_R_factor_gt            0.0732 
_refine_ls_wR_factor_ref          0.1992 
_refine_ls_wR_factor_gt           0.1589 
_refine_ls_goodness_of_fit_ref    0.981 
_refine_ls_restrained_S_all       0.981 
_refine_ls_shift/su_max           0.042 
_refine_ls_shift/su_mean          0.001 
 
loop_ 
 _atom_site_label 
 _atom_site_type_symbol 
 _atom_site_fract_x 
 _atom_site_fract_y 
 _atom_site_fract_z 
 _atom_site_U_iso_or_equiv 
 _atom_site_adp_type 
 _atom_site_occupancy 
 _atom_site_symmetry_multiplicity 
 _atom_site_calc_flag 
 _atom_site_refinement_flags 
 _atom_site_disorder_assembly 
 _atom_site_disorder_group 
Y1 Y 0.119314(12) 0.29409(4) 0.55820(3) 0.0375(2) Uani 1 1 d . . . 
N1 N 0.08118(9) 0.2575(3) 0.4512(2) 0.0359(12) Uani 1 1 d . . . 
N2 N 0.12840(9) 0.3068(3) 0.4341(2) 0.0326(11) Uani 1 1 d . . . 
N3 N 0.16235(9) 0.2284(3) 0.5469(2) 0.0359(12) Uani 1 1 d . . . 
N4 N 0.09598(12) 0.2284(4) 0.6283(3) 0.0448(15) Uani 1 1 d . . . 
P1 P 0.09584(3) 0.27616(11) 0.38773(9) 0.0348(4) Uani 1 1 d . . . 
P2 P 0.16057(3) 0.26553(11) 0.46557(8) 0.0339(4) Uani 1 1 d . . . 
Si1 Si 0.13423(5) 0.57183(14) 0.60441(11) 0.0599(6) Uani 1 1 d . . . 
H1 H 0.0840(12) 0.214(4) 0.599(3) 0.03(2) Uiso 1 1 d . . . 
C1 C 0.05028(12) 0.2543(4) 0.4386(3) 0.0391(15) Uani 1 1 d . . . 
C2 C 0.03592(12) 0.3354(4) 0.4492(3) 0.0397(15) Uani 1 1 d . . . 
C3 C 0.00636(13) 0.3309(5) 0.4394(3) 0.0508(17) Uani 1 1 d . . . 
H3 H -0.0032 0.3843 0.4466 0.061 Uiso 1 1 calc R . . 
C4 C -0.00881(14) 0.2495(6) 0.4193(4) 0.0580(19) Uani 1 1 d . . . 
H4 H -0.0286 0.2481 0.4122 0.070 Uiso 1 1 calc R . . 
C5 C 0.00525(14) 0.1696(5) 0.4095(4) 0.060(2) Uani 1 1 d . . . 
H5 H -0.0051 0.1144 0.3964 0.072 Uiso 1 1 calc R . . 
C6 C 0.03501(13) 0.1701(5) 0.4191(3) 0.0483(17) Uani 1 1 d . . . 
C7 C 0.05126(13) 0.4272(4) 0.4761(3) 0.0436(16) Uani 1 1 d . . . 
H7 H 0.0712 0.4213 0.4754 0.052 Uiso 1 1 calc R . . 
C8 C 0.03753(14) 0.5109(4) 0.4280(3) 0.0542(18) Uani 1 1 d . . . 
H8A H 0.0372 0.5000 0.3782 0.081 Uiso 1 1 calc R . . 
H8B H 0.0487 0.5660 0.4468 0.081 Uiso 1 1 calc R . . 
H8C H 0.0181 0.5194 0.4287 0.081 Uiso 1 1 calc R . . 
C9 C 0.05263(14) 0.4462(5) 0.5567(3) 0.0582(19) Uani 1 1 d . . . 
H9A H 0.0333 0.4497 0.5594 0.087 Uiso 1 1 calc R . . 
H9B H 0.0624 0.5043 0.5730 0.087 Uiso 1 1 calc R . . 
H9C H 0.0630 0.3966 0.5878 0.087 Uiso 1 1 calc R . . 
C10 C 0.04893(15) 0.0783(5) 0.4078(5) 0.072(2) Uani 1 1 d . . . 
H10 H 0.0693 0.0921 0.4143 0.086 Uiso 1 1 calc R . . 
C11 C 0.04885(17) 0.0059(6) 0.4660(6) 0.111(4) Uani 1 1 d . . . 
H11A H 0.0605 0.0278 0.5137 0.167 Uiso 1 1 calc R . . 
H11B H 0.0566 -0.0518 0.4551 0.167 Uiso 1 1 calc R . . 
H11C H 0.0294 -0.0039 0.4658 0.167 Uiso 1 1 calc R . . 
C12 C 0.03580(18) 0.0408(6) 0.3303(5) 0.098(3) Uani 1 1 d . . . 
H12A H 0.0162 0.0219 0.3228 0.147 Uiso 1 1 calc R . . 
H12B H 0.0468 -0.0119 0.3234 0.147 Uiso 1 1 calc R . . 
H12C H 0.0360 0.0887 0.2954 0.147 Uiso 1 1 calc R . . 
C13 C 0.07840(12) 0.3693(4) 0.3277(3) 0.0350(14) Uani 1 1 d . . . 
C14 C 0.04959(13) 0.3603(4) 0.2825(3) 0.0452(16) Uani 1 1 d . . . 
H14 H 0.0396 0.3052 0.2831 0.054 Uiso 1 1 calc R . . 
C15 C 0.03597(14) 0.4324(5) 0.2371(3) 0.0516(18) Uani 1 1 d . . . 
H15 H 0.0169 0.4257 0.2068 0.062 Uiso 1 1 calc R . . 
C16 C 0.05058(16) 0.5143(5) 0.2368(4) 0.0557(19) Uani 1 1 d . . . 
H16 H 0.0413 0.5630 0.2062 0.067 Uiso 1 1 calc R . . 
C17 C 0.07827(17) 0.5247(5) 0.2803(4) 0.0583(19) Uani 1 1 d . . . 
H17 H 0.0879 0.5807 0.2798 0.070 Uiso 1 1 calc R . . 
C18 C 0.09264(14) 0.4519(4) 0.3260(3) 0.0435(16) Uani 1 1 d . . . 
H18 H 0.1118 0.4592 0.3554 0.052 Uiso 1 1 calc R . . 
C19 C 0.09546(12) 0.1785(4) 0.3277(3) 0.0381(15) Uani 1 1 d . . . 
C20 C 0.08571(13) 0.1847(5) 0.2509(4) 0.0519(18) Uani 1 1 d . . . 
H20 H 0.0784 0.2410 0.2284 0.062 Uiso 1 1 calc R . . 
C21 C 0.08681(15) 0.1075(5) 0.2075(4) 0.065(2) Uani 1 1 d . . . 
H21 H 0.0799 0.1125 0.1564 0.078 Uiso 1 1 calc R . . 
C22 C 0.09789(15) 0.0253(5) 0.2393(5) 0.067(2) Uani 1 1 d . . . 
H22 H 0.0987 -0.0258 0.2101 0.080 Uiso 1 1 calc R . . 
C23 C 0.10790(14) 0.0177(5) 0.3145(5) 0.062(2) Uani 1 1 d . . . 
H23 H 0.1155 -0.0388 0.3362 0.075 Uiso 1 1 calc R . . 
C24 C 0.10691(13) 0.0936(4) 0.3587(4) 0.0480(17) Uani 1 1 d . . . 
H24 H 0.1140 0.0876 0.4098 0.058 Uiso 1 1 calc R . . 
C25 C 0.16976(11) 0.1823(4) 0.4063(3) 0.0346(14) Uani 1 1 d . . . 
C26 C 0.16070(12) 0.2008(4) 0.3303(3) 0.0412(15) Uani 1 1 d . . . 
H26 H 0.1494 0.2530 0.3118 0.049 Uiso 1 1 calc R . . 
C27 C 0.16840(13) 0.1429(5) 0.2832(3) 0.0464(17) Uani 1 1 d . . . 
H27 H 0.1624 0.1562 0.2330 0.056 Uiso 1 1 calc R . . 
C28 C 0.18490(14) 0.0651(5) 0.3094(4) 0.0519(18) Uani 1 1 d . . . 
H28 H 0.1893 0.0245 0.2767 0.062 Uiso 1 1 calc R . . 
C29 C 0.19484(14) 0.0468(4) 0.3834(4) 0.0514(18) Uani 1 1 d . . . 
H29 H 0.2066 -0.0047 0.4011 0.062 Uiso 1 1 calc R . . 
C30 C 0.18724(12) 0.1060(4) 0.4322(3) 0.0419(16) Uani 1 1 d . . . 
H30 H 0.1940 0.0938 0.4826 0.050 Uiso 1 1 calc R . . 
C31 C 0.18411(12) 0.3614(4) 0.4618(3) 0.0364(14) Uani 1 1 d . . . 
C32 C 0.20833(13) 0.3499(5) 0.4403(4) 0.0535(18) Uani 1 1 d . . . 
H32 H 0.2130 0.2907 0.4280 0.064 Uiso 1 1 calc R . . 
C33 C 0.22569(15) 0.4245(6) 0.4367(4) 0.067(2) Uani 1 1 d . . . 
H33 H 0.2418 0.4151 0.4217 0.081 Uiso 1 1 calc R . . 
C34 C 0.21929(15) 0.5133(6) 0.4555(4) 0.062(2) Uani 1 1 d . . . 
H34 H 0.2309 0.5636 0.4528 0.074 Uiso 1 1 calc R . . 
C35 C 0.19540(14) 0.5266(5) 0.4783(4) 0.0587(19) Uani 1 1 d . . . 
H35 H 0.1910 0.5857 0.4918 0.070 Uiso 1 1 calc R . . 
C36 C 0.17796(13) 0.4505(4) 0.4810(3) 0.0454(16) Uani 1 1 d . . . 
H36 H 0.1618 0.4596 0.4959 0.054 Uiso 1 1 calc R . . 
C37 C 0.18505(14) 0.1739(5) 0.5974(3) 0.0453(17) Uani 1 1 d . . . 
C38 C 0.21003(14) 0.2178(5) 0.6448(4) 0.0550(19) Uani 1 1 d . . . 
C39 C 0.23102(17) 0.1629(7) 0.6936(4) 0.079(3) Uani 1 1 d . . . 
H39 H 0.2477 0.1910 0.7244 0.095 Uiso 1 1 calc R . . 
C40 C 0.2278(2) 0.0684(8) 0.6973(5) 0.091(3) Uani 1 1 d . . . 
H40 H 0.2421 0.0326 0.7303 0.109 Uiso 1 1 calc R . . 
C41 C 0.2032(2) 0.0272(6) 0.6516(5) 0.085(3) Uani 1 1 d . . . 
H41 H 0.2011 -0.0371 0.6537 0.102 Uiso 1 1 calc R . . 
C42 C 0.18143(17) 0.0782(5) 0.6027(4) 0.056(2) Uani 1 1 d . . . 
C43 C 0.1544(2) 0.0282(5) 0.5554(4) 0.075(2) Uani 1 1 d . . . 
H43 H 0.1455 0.0684 0.5127 0.090 Uiso 1 1 calc R . . 
C44 C 0.1591(2) -0.0668(6) 0.5251(6) 0.128(4) Uani 1 1 d . . . 
H44A H 0.1735 -0.0613 0.5009 0.192 Uiso 1 1 calc R . . 
H44B H 0.1413 -0.0881 0.4903 0.192 Uiso 1 1 calc R . . 
H44C H 0.1656 -0.1107 0.5649 0.192 Uiso 1 1 calc R . . 
C45 C 0.13226(16) 0.0163(6) 0.5957(4) 0.076(2) Uani 1 1 d . . . 
H45A H 0.1409 -0.0172 0.6408 0.114 Uiso 1 1 calc R . . 
H45B H 0.1159 -0.0178 0.5650 0.114 Uiso 1 1 calc R . . 
H45C H 0.1261 0.0767 0.6065 0.114 Uiso 1 1 calc R . . 
C46 C 0.21470(13) 0.3211(6) 0.6466(4) 0.061(2) Uani 1 1 d . . . 
H46 H 0.1987 0.3486 0.6068 0.073 Uiso 1 1 calc R . . 
C47 C 0.21374(17) 0.3627(6) 0.7202(4) 0.086(3) Uani 1 1 d . . . 
H47A H 0.1956 0.3474 0.7269 0.129 Uiso 1 1 calc R . . 
H47B H 0.2157 0.4293 0.7192 0.129 Uiso 1 1 calc R . . 
H47C H 0.2293 0.3373 0.7602 0.129 Uiso 1 1 calc R . . 
C48 C 0.24291(15) 0.3493(7) 0.6341(5) 0.102(3) Uani 1 1 d . . . 
H48A H 0.2590 0.3284 0.6748 0.153 Uiso 1 1 calc R . . 
H48B H 0.2436 0.4160 0.6302 0.153 Uiso 1 1 calc R . . 
H48C H 0.2438 0.3213 0.5893 0.153 Uiso 1 1 calc R . . 
C49 C 0.08982(12) 0.2298(4) 0.6951(3) 0.0356(14) Uani 1 1 d . . . 
C50 C 0.11263(13) 0.2449(4) 0.7617(3) 0.0409(15) Uani 1 1 d . . . 
C51 C 0.10711(14) 0.2418(4) 0.8287(3) 0.0471(16) Uani 1 1 d . . . 
H51 H 0.1223 0.2507 0.8723 0.057 Uiso 1 1 calc R . . 
C52 C 0.07957(15) 0.2255(4) 0.8317(4) 0.0547(18) Uani 1 1 d . . . 
H52 H 0.0762 0.2224 0.8769 0.066 Uiso 1 1 calc R . . 
C53 C 0.05730(14) 0.2141(4) 0.7670(4) 0.0516(17) Uani 1 1 d . . . 
H53 H 0.0387 0.2046 0.7691 0.062 Uiso 1 1 calc R . . 
C54 C 0.06130(12) 0.2160(4) 0.6988(3) 0.0408(15) Uani 1 1 d . . . 
C55 C 0.03571(13) 0.1968(4) 0.6301(4) 0.0493(17) Uani 1 1 d . . . 
H55 H 0.0407 0.2205 0.5878 0.059 Uiso 1 1 calc R . . 
C56 C 0.03090(18) 0.0928(6) 0.6196(5) 0.101(3) Uani 1 1 d . . . 
H56A H 0.0485 0.0633 0.6192 0.151 Uiso 1 1 calc R . . 
H56B H 0.0160 0.0811 0.5736 0.151 Uiso 1 1 calc R . . 
H56C H 0.0252 0.0679 0.6593 0.151 Uiso 1 1 calc R . . 
C57 C 0.00763(15) 0.2442(7) 0.6294(5) 0.099(3) Uani 1 1 d . . . 
H57A H 0.0014 0.2192 0.6684 0.149 Uiso 1 1 calc R . . 
H57B H -0.0070 0.2330 0.5828 0.149 Uiso 1 1 calc R . . 
H57C H 0.0108 0.3101 0.6364 0.149 Uiso 1 1 calc R . . 
C58 C 0.14329(12) 0.2610(4) 0.7631(3) 0.0441(16) Uani 1 1 d . . . 
H58 H 0.1425 0.2820 0.7138 0.053 Uiso 1 1 calc R . . 
C59 C 0.16060(13) 0.1705(5) 0.7788(4) 0.061(2) Uani 1 1 d . . . 
H59A H 0.1625 0.1494 0.8277 0.092 Uiso 1 1 calc R . . 
H59B H 0.1795 0.1813 0.7748 0.092 Uiso 1 1 calc R . . 
H59C H 0.1508 0.1239 0.7436 0.092 Uiso 1 1 calc R . . 
C60 C 0.15861(15) 0.3374(5) 0.8177(4) 0.073(2) Uani 1 1 d . . . 
H60A H 0.1474 0.3937 0.8069 0.109 Uiso 1 1 calc R . . 
H60B H 0.1774 0.3488 0.8134 0.109 Uiso 1 1 calc R . . 
H60C H 0.1607 0.3175 0.8670 0.109 Uiso 1 1 calc R . . 
C61 C 0.13172(14) 0.4435(5) 0.6117(4) 0.0574(19) Uani 1 1 d . . . 
H61A H 0.1213 0.4410 0.6471 0.069 Uiso 1 1 calc R . . 
H61B H 0.1516 0.4308 0.6411 0.069 Uiso 1 1 calc R . . 
C62 C 0.1124(2) 0.6368(6) 0.6532(5) 0.099(3) Uani 1 1 d . . . 
H62A H 0.0923 0.6228 0.6304 0.148 Uiso 1 1 calc R . . 
H62B H 0.1154 0.7027 0.6500 0.148 Uiso 1 1 calc R . . 
H62C H 0.1183 0.6183 0.7040 0.148 Uiso 1 1 calc R . . 
C63 C 0.17213(17) 0.6135(6) 0.6473(5) 0.096(3) Uani 1 1 d . . . 
H63A H 0.1786 0.5985 0.6989 0.144 Uiso 1 1 calc R . . 
H63B H 0.1728 0.6799 0.6413 0.144 Uiso 1 1 calc R . . 
H63C H 0.1845 0.5836 0.6239 0.144 Uiso 1 1 calc R . . 
C64 C 0.12097(19) 0.6164(5) 0.5072(4) 0.086(3) Uani 1 1 d . . . 
H64A H 0.1324 0.5899 0.4798 0.129 Uiso 1 1 calc R . . 
H64B H 0.1226 0.6832 0.5075 0.129 Uiso 1 1 calc R . . 
H64C H 0.1011 0.5990 0.4847 0.129 Uiso 1 1 calc R . . 
C65 C 0.2741(2) 0.7193(7) 0.5261(5) 0.109(3) Uiso 1 1 d . . . 
H65A H 0.2808 0.6552 0.5289 0.131 Uiso 1 1 calc R . . 
H65B H 0.2910 0.7550 0.5535 0.131 Uiso 1 1 calc R . . 
C66 C 0.2590(3) 0.7186(9) 0.5708(7) 0.158(5) Uiso 1 1 d . . . 
H66 H 0.2685 0.6922 0.6166 0.189 Uiso 1 1 calc R . . 
C67 C 0.2296(3) 0.7519(9) 0.5625(7) 0.161(5) Uiso 1 1 d . . . 
H67A H 0.2291 0.8049 0.5935 0.193 Uiso 1 1 calc R . . 
H67B H 0.2165 0.7031 0.5671 0.193 Uiso 1 1 calc R . . 
 
loop_ 
 _atom_site_aniso_label 
 _atom_site_aniso_U_11 
 _atom_site_aniso_U_22 
 _atom_site_aniso_U_33 
 _atom_site_aniso_U_23 
 _atom_site_aniso_U_13 
 _atom_site_aniso_U_12 
Y1 0.0311(3) 0.0406(4) 0.0474(4) -0.0014(3) 0.0216(3) -0.0016(3) 
N1 0.027(3) 0.034(3) 0.053(3) 0.003(2) 0.022(2) -0.002(2) 
N2 0.028(3) 0.028(3) 0.046(3) 0.003(2) 0.018(2) -0.002(2) 
N3 0.034(3) 0.032(3) 0.047(3) 0.001(2) 0.020(2) -0.001(2) 
N4 0.030(3) 0.054(4) 0.050(4) 0.006(3) 0.012(3) 0.000(3) 
P1 0.0292(8) 0.0311(10) 0.0487(9) 0.0001(8) 0.0192(7) -0.0011(7) 
P2 0.0283(8) 0.0332(10) 0.0453(9) -0.0010(7) 0.0190(7) -0.0025(7) 
Si1 0.0723(14) 0.0485(13) 0.0698(14) -0.0086(11) 0.0379(12) -0.0065(11) 
C1 0.028(3) 0.046(4) 0.048(4) 0.003(3) 0.019(3) -0.003(3) 
C2 0.031(3) 0.049(4) 0.042(4) 0.005(3) 0.017(3) 0.005(3) 
C3 0.034(4) 0.064(5) 0.058(4) 0.000(4) 0.019(3) 0.005(4) 
C4 0.025(4) 0.077(5) 0.068(5) 0.012(4) 0.009(3) -0.001(4) 
C5 0.033(4) 0.067(5) 0.078(5) 0.001(4) 0.017(4) -0.011(4) 
C6 0.036(4) 0.050(4) 0.063(4) 0.002(4) 0.022(3) -0.006(3) 
C7 0.034(4) 0.054(4) 0.045(4) -0.002(3) 0.016(3) 0.010(3) 
C8 0.062(5) 0.046(4) 0.059(4) -0.003(4) 0.026(4) 0.003(4) 
C9 0.054(4) 0.067(5) 0.055(4) -0.007(4) 0.019(4) 0.011(4) 
C10 0.044(4) 0.051(5) 0.133(7) 0.007(5) 0.045(5) -0.007(4) 
C11 0.056(6) 0.065(6) 0.209(11) 0.035(7) 0.036(6) 0.006(5) 
C12 0.080(6) 0.078(7) 0.147(9) -0.047(6) 0.053(6) -0.031(5) 
C13 0.035(3) 0.032(4) 0.043(3) -0.007(3) 0.020(3) 0.000(3) 
C14 0.048(4) 0.038(4) 0.052(4) 0.002(3) 0.019(3) -0.002(3) 
C15 0.048(4) 0.067(5) 0.039(4) 0.002(4) 0.013(3) 0.012(4) 
C16 0.072(5) 0.044(5) 0.050(4) 0.011(4) 0.018(4) 0.015(4) 
C17 0.074(5) 0.041(4) 0.063(5) 0.001(4) 0.026(4) -0.007(4) 
C18 0.049(4) 0.035(4) 0.048(4) -0.003(3) 0.018(3) -0.003(3) 
C19 0.029(3) 0.027(4) 0.060(4) -0.002(3) 0.017(3) -0.005(3) 
C20 0.040(4) 0.044(4) 0.073(5) -0.007(4) 0.021(4) -0.005(3) 
C21 0.059(5) 0.057(5) 0.077(5) -0.031(4) 0.021(4) -0.005(4) 
C22 0.056(5) 0.043(5) 0.109(7) -0.035(5) 0.036(5) -0.008(4) 
C23 0.046(4) 0.039(5) 0.109(7) -0.009(5) 0.035(5) 0.000(3) 
C24 0.036(4) 0.037(4) 0.077(5) -0.001(4) 0.027(3) -0.005(3) 
C25 0.026(3) 0.031(4) 0.052(4) -0.002(3) 0.020(3) -0.004(3) 
C26 0.035(3) 0.040(4) 0.049(4) -0.006(3) 0.015(3) -0.004(3) 
C27 0.051(4) 0.053(5) 0.040(4) -0.011(3) 0.021(3) -0.011(4) 
C28 0.046(4) 0.057(5) 0.066(5) -0.018(4) 0.037(4) -0.010(4) 
C29 0.048(4) 0.039(4) 0.075(5) -0.003(4) 0.030(4) 0.003(3) 
C30 0.035(4) 0.043(4) 0.055(4) 0.001(3) 0.024(3) -0.002(3) 
C31 0.035(3) 0.034(4) 0.045(3) 0.000(3) 0.019(3) -0.005(3) 
C32 0.048(4) 0.047(4) 0.079(5) -0.010(4) 0.037(4) -0.014(3) 
C33 0.052(5) 0.076(6) 0.092(6) -0.027(5) 0.047(4) -0.029(4) 
C34 0.057(5) 0.064(5) 0.067(5) -0.004(4) 0.024(4) -0.032(4) 
C35 0.056(5) 0.046(5) 0.075(5) -0.008(4) 0.021(4) -0.015(4) 
C36 0.034(4) 0.045(4) 0.061(4) -0.001(3) 0.021(3) -0.006(3) 
C37 0.050(4) 0.050(4) 0.049(4) 0.014(3) 0.035(3) 0.016(3) 
C38 0.034(4) 0.076(6) 0.063(4) 0.032(4) 0.026(3) 0.021(4) 
C39 0.058(5) 0.111(8) 0.077(6) 0.032(6) 0.034(4) 0.023(5) 
C40 0.086(7) 0.132(10) 0.067(6) 0.052(6) 0.043(5) 0.057(7) 
C41 0.139(9) 0.067(6) 0.073(6) 0.034(5) 0.068(6) 0.047(6) 
C42 0.091(6) 0.047(5) 0.046(4) 0.017(4) 0.043(4) 0.023(4) 
C43 0.143(8) 0.036(5) 0.056(5) 0.008(4) 0.047(5) 0.001(5) 
C44 0.216(12) 0.058(6) 0.175(10) -0.029(6) 0.153(10) -0.037(7) 
C45 0.073(5) 0.071(6) 0.080(5) -0.002(5) 0.018(5) 0.011(4) 
C46 0.032(4) 0.093(6) 0.054(4) 0.020(4) 0.009(3) -0.004(4) 
C47 0.073(6) 0.088(7) 0.085(6) 0.007(5) 0.011(5) -0.017(5) 
C48 0.040(5) 0.150(9) 0.113(7) 0.036(7) 0.019(5) -0.020(5) 
C49 0.039(4) 0.029(4) 0.044(3) 0.000(3) 0.019(3) -0.001(3) 
C50 0.039(4) 0.033(4) 0.052(4) 0.004(3) 0.016(3) 0.003(3) 
C51 0.051(4) 0.042(4) 0.047(4) 0.002(3) 0.013(3) -0.007(3) 
C52 0.067(5) 0.052(5) 0.055(4) 0.001(4) 0.033(4) -0.006(4) 
C53 0.050(4) 0.050(5) 0.065(5) 0.002(4) 0.032(4) -0.005(3) 
C54 0.037(4) 0.035(4) 0.056(4) 0.005(3) 0.022(3) 0.000(3) 
C55 0.039(4) 0.049(4) 0.065(4) 0.010(4) 0.025(3) -0.008(3) 
C56 0.085(6) 0.078(6) 0.106(7) 0.013(6) -0.017(5) -0.023(5) 
C57 0.040(5) 0.172(10) 0.089(6) 0.017(6) 0.025(4) 0.026(5) 
C58 0.039(4) 0.042(4) 0.049(4) 0.004(3) 0.010(3) -0.003(3) 
C59 0.040(4) 0.070(5) 0.075(5) 0.002(4) 0.020(4) 0.008(4) 
C60 0.048(4) 0.082(6) 0.087(5) -0.020(5) 0.022(4) -0.016(4) 
C61 0.046(4) 0.063(5) 0.067(4) -0.003(4) 0.024(4) 0.002(4) 
C62 0.136(8) 0.063(6) 0.131(8) -0.024(5) 0.090(7) -0.001(5) 
C63 0.094(7) 0.080(6) 0.120(7) -0.023(6) 0.044(6) -0.026(5) 
C64 0.120(7) 0.053(5) 0.100(6) 0.018(5) 0.057(6) 0.026(5) 
 
_geom_special_details 
; 
 All esds (except the esd in the dihedral angle between two l.s. planes) 
 are estimated using the full covariance matrix.  The cell esds are taken 
 into account individually in the estimation of esds in distances, angles 
 and torsion angles; correlations between esds in cell parameters are only 
 used when they are defined by crystal symmetry.  An approximate (isotropic) 
 treatment of cell esds is used for estimating esds involving l.s. planes. 
; 
 
loop_ 
 _geom_bond_atom_site_label_1 
 _geom_bond_atom_site_label_2 
 _geom_bond_distance 
 _geom_bond_site_symmetry_2 
 _geom_bond_publ_flag 
Y1 N4 2.230(5) . ? 
Y1 N1 2.342(5) . ? 
Y1 C61 2.366(6) . ? 
Y1 N3 2.375(4) . ? 
Y1 N2 2.561(4) . ? 
N1 C1 1.450(6) . ? 
N1 P1 1.619(4) . ? 
N2 P2 1.603(4) . ? 
N2 P1 1.612(4) . ? 
N3 C37 1.443(7) . ? 
N3 P2 1.622(5) . ? 
N4 C49 1.404(7) . ? 
P1 C13 1.788(6) . ? 
P1 C19 1.807(6) . ? 
P2 C25 1.799(6) . ? 
P2 C31 1.807(6) . ? 
Si1 C61 1.851(7) . ? 
Si1 C63 1.865(8) . ? 
Si1 C62 1.875(7) . ? 
Si1 C64 1.875(8) . ? 
C1 C6 1.404(8) . ? 
C1 C2 1.406(8) . ? 
C2 C3 1.395(8) . ? 
C2 C7 1.519(8) . ? 
C3 C4 1.368(9) . ? 
C4 C5 1.378(9) . ? 
C5 C6 1.404(8) . ? 
C6 C10 1.527(9) . ? 
C7 C8 1.530(8) . ? 
C7 C9 1.548(8) . ? 
C10 C12 1.514(10) . ? 
C10 C11 1.522(10) . ? 
C13 C18 1.378(8) . ? 
C13 C14 1.400(8) . ? 
C14 C15 1.375(8) . ? 
C15 C16 1.375(9) . ? 
C16 C17 1.348(9) . ? 
C17 C18 1.397(8) . ? 
C19 C24 1.389(8) . ? 
C19 C20 1.395(8) . ? 
C20 C21 1.394(8) . ? 
C21 C22 1.357(10) . ? 
C22 C23 1.367(10) . ? 
C23 C24 1.389(9) . ? 
C25 C30 1.377(8) . ? 
C25 C26 1.404(8) . ? 
C26 C27 1.364(8) . ? 
C27 C28 1.373(9) . ? 
C28 C29 1.366(9) . ? 
C29 C30 1.399(8) . ? 
C31 C32 1.381(8) . ? 
C31 C36 1.388(8) . ? 
C32 C33 1.379(9) . ? 
C33 C34 1.384(9) . ? 
C34 C35 1.384(9) . ? 
C35 C36 1.394(8) . ? 
C37 C42 1.390(9) . ? 
C37 C38 1.412(9) . ? 
C38 C39 1.387(9) . ? 
C38 C46 1.496(10) . ? 
C39 C40 1.368(12) . ? 
C40 C41 1.371(12) . ? 
C41 C42 1.377(10) . ? 
C42 C43 1.518(10) . ? 
C43 C45 1.527(10) . ? 
C43 C44 1.525(10) . ? 
C46 C48 1.527(9) . ? 
C46 C47 1.544(10) . ? 
C49 C50 1.414(8) . ? 
C49 C54 1.431(7) . ? 
C50 C51 1.394(8) . ? 
C50 C58 1.506(8) . ? 
C51 C52 1.384(8) . ? 
C52 C53 1.370(9) . ? 
C53 C54 1.381(8) . ? 
C54 C55 1.519(8) . ? 
C55 C56 1.512(9) . ? 
C55 C57 1.526(9) . ? 
C58 C59 1.524(8) . ? 
C58 C60 1.531(8) . ? 
C65 C66 1.296(13) . ? 
C65 C67 1.699(14) 7_566 ? 
C66 C67 1.473(15) . ? 
C67 C65 1.699(14) 7_566 ? 
 
loop_ 
 _geom_angle_atom_site_label_1 
 _geom_angle_atom_site_label_2 
 _geom_angle_atom_site_label_3 
 _geom_angle 
 _geom_angle_site_symmetry_1 
 _geom_angle_site_symmetry_3 
 _geom_angle_publ_flag 
N4 Y1 N1 90.91(19) . . ? 
N4 Y1 C61 103.3(2) . . ? 
N1 Y1 C61 127.0(2) . . ? 
N4 Y1 N3 121.74(18) . . ? 
N1 Y1 N3 108.01(15) . . ? 
C61 Y1 N3 106.69(19) . . ? 
N4 Y1 N2 149.75(19) . . ? 
N1 Y1 N2 62.00(14) . . ? 
C61 Y1 N2 103.94(19) . . ? 
N3 Y1 N2 61.39(14) . . ? 
C1 N1 P1 124.6(4) . . ? 
C1 N1 Y1 130.1(3) . . ? 
P1 N1 Y1 101.6(2) . . ? 
P2 N2 P1 141.2(3) . . ? 
P2 N2 Y1 93.80(19) . . ? 
P1 N2 Y1 93.27(18) . . ? 
C37 N3 P2 127.8(4) . . ? 
C37 N3 Y1 131.7(3) . . ? 
P2 N3 Y1 100.5(2) . . ? 
C49 N4 Y1 147.4(5) . . ? 
N2 P1 N1 103.2(2) . . ? 
N2 P1 C13 109.4(2) . . ? 
N1 P1 C13 111.8(2) . . ? 
N2 P1 C19 111.6(2) . . ? 
N1 P1 C19 115.7(3) . . ? 
C13 P1 C19 105.3(3) . . ? 
N2 P2 N3 103.0(2) . . ? 
N2 P2 C25 114.8(3) . . ? 
N3 P2 C25 116.2(3) . . ? 
N2 P2 C31 105.3(3) . . ? 
N3 P2 C31 116.7(3) . . ? 
C25 P2 C31 100.8(3) . . ? 
C61 Si1 C63 111.4(4) . . ? 
C61 Si1 C62 113.2(3) . . ? 
C63 Si1 C62 105.3(4) . . ? 
C61 Si1 C64 113.8(3) . . ? 
C63 Si1 C64 107.8(4) . . ? 
C62 Si1 C64 104.8(4) . . ? 
C6 C1 C2 120.1(5) . . ? 
C6 C1 N1 120.4(5) . . ? 
C2 C1 N1 119.4(5) . . ? 
C3 C2 C1 119.0(6) . . ? 
C3 C2 C7 117.5(6) . . ? 
C1 C2 C7 123.4(5) . . ? 
C4 C3 C2 121.4(6) . . ? 
C3 C4 C5 119.8(6) . . ? 
C4 C5 C6 121.2(7) . . ? 
C1 C6 C5 118.5(6) . . ? 
C1 C6 C10 123.7(6) . . ? 
C5 C6 C10 117.8(6) . . ? 
C2 C7 C8 113.7(5) . . ? 
C2 C7 C9 110.4(5) . . ? 
C8 C7 C9 109.4(5) . . ? 
C12 C10 C11 112.1(7) . . ? 
C12 C10 C6 112.2(7) . . ? 
C11 C10 C6 112.1(6) . . ? 
C18 C13 C14 118.6(6) . . ? 
C18 C13 P1 121.1(5) . . ? 
C14 C13 P1 120.3(5) . . ? 
C15 C14 C13 120.4(6) . . ? 
C16 C15 C14 119.9(6) . . ? 
C17 C16 C15 120.7(7) . . ? 
C16 C17 C18 120.4(7) . . ? 
C13 C18 C17 120.0(6) . . ? 
C24 C19 C20 117.4(6) . . ? 
C24 C19 P1 119.0(5) . . ? 
C20 C19 P1 123.5(5) . . ? 
C19 C20 C21 120.8(7) . . ? 
C22 C21 C20 120.5(7) . . ? 
C21 C22 C23 119.8(7) . . ? 
C22 C23 C24 120.6(7) . . ? 
C19 C24 C23 120.8(7) . . ? 
C30 C25 C26 118.4(5) . . ? 
C30 C25 P2 123.3(5) . . ? 
C26 C25 P2 118.0(4) . . ? 
C27 C26 C25 120.6(6) . . ? 
C26 C27 C28 120.4(6) . . ? 
C29 C28 C27 120.4(6) . . ? 
C28 C29 C30 119.7(6) . . ? 
C25 C30 C29 120.5(6) . . ? 
C32 C31 C36 117.8(6) . . ? 
C32 C31 P2 122.6(5) . . ? 
C36 C31 P2 119.6(4) . . ? 
C31 C32 C33 121.4(7) . . ? 
C32 C33 C34 120.4(6) . . ? 
C35 C34 C33 119.5(7) . . ? 
C34 C35 C36 119.4(7) . . ? 
C35 C36 C31 121.5(6) . . ? 
C42 C37 C38 119.7(6) . . ? 
C42 C37 N3 119.6(6) . . ? 
C38 C37 N3 120.5(6) . . ? 
C39 C38 C37 118.6(8) . . ? 
C39 C38 C46 118.1(7) . . ? 
C37 C38 C46 123.3(6) . . ? 
C40 C39 C38 121.6(9) . . ? 
C39 C40 C41 119.0(8) . . ? 
C42 C41 C40 122.1(9) . . ? 
C41 C42 C37 118.9(8) . . ? 
C41 C42 C43 119.2(8) . . ? 
C37 C42 C43 121.9(6) . . ? 
C42 C43 C45 111.8(6) . . ? 
C42 C43 C44 116.1(8) . . ? 
C45 C43 C44 108.2(6) . . ? 
C38 C46 C48 113.4(7) . . ? 
C38 C46 C47 110.7(6) . . ? 
C48 C46 C47 109.6(6) . . ? 
N4 C49 C50 119.1(5) . . ? 
N4 C49 C54 122.7(5) . . ? 
C50 C49 C54 118.2(5) . . ? 
C51 C50 C49 119.7(6) . . ? 
C51 C50 C58 118.3(6) . . ? 
C49 C50 C58 122.0(5) . . ? 
C52 C51 C50 121.5(6) . . ? 
C53 C52 C51 118.7(6) . . ? 
C52 C53 C54 122.7(6) . . ? 
C53 C54 C49 119.1(6) . . ? 
C53 C54 C55 119.2(5) . . ? 
C49 C54 C55 121.6(5) . . ? 
C56 C55 C54 110.0(5) . . ? 
C56 C55 C57 109.7(6) . . ? 
C54 C55 C57 114.5(6) . . ? 
C50 C58 C59 111.0(5) . . ? 
C50 C58 C60 112.7(5) . . ? 
C59 C58 C60 110.8(5) . . ? 
Si1 C61 Y1 151.6(4) . . ? 
C66 C65 C67 139.7(10) . 7_566 ? 
C65 C66 C67 131.9(13) . . ? 
C66 C67 C65 88.4(9) . 7_566 ? 
 
_diffrn_measured_fraction_theta_max    0.998 
_diffrn_reflns_theta_full              25.06 
_diffrn_measured_fraction_theta_full   0.998 
_refine_diff_density_max    1.263 
_refine_diff_density_min   -0.437 
_refine_diff_density_rms    0.079 


#===========END============= 

 

 
data_10
 
_audit_creation_method            SHELXL-97 
_chemical_name_systematic 
; 
 ? 
; 
_chemical_name_common             ? 
_chemical_melting_point           ? 
_chemical_formula_moiety          ? 
_chemical_formula_sum 
 'C64 H83 Lu N4 P2 Si' 
_chemical_formula_weight          1173.34 
 
loop_ 
 _atom_type_symbol 
 _atom_type_description 
 _atom_type_scat_dispersion_real 
 _atom_type_scat_dispersion_imag 
 _atom_type_scat_source 
 'C'  'C'   0.0033   0.0016 
 'International Tables Vol C Tables 4.2.6.8 and 6.1.1.4' 
 'H'  'H'   0.0000   0.0000 
 'International Tables Vol C Tables 4.2.6.8 and 6.1.1.4' 
 'N'  'N'   0.0061   0.0033 
 'International Tables Vol C Tables 4.2.6.8 and 6.1.1.4' 
 'Si'  'Si'   0.0817   0.0704 
 'International Tables Vol C Tables 4.2.6.8 and 6.1.1.4' 
 'P'  'P'   0.1023   0.0942 
 'International Tables Vol C Tables 4.2.6.8 and 6.1.1.4' 
 'Lu'  'Lu'  -0.4720   5.8584 
 'International Tables Vol C Tables 4.2.6.8 and 6.1.1.4' 
 
_symmetry_cell_setting            monoclinic
_symmetry_space_group_name_H-M    Cc 
 
loop_ 
 _symmetry_equiv_pos_as_xyz 
 'x, y, z' 
 'x, -y, z+1/2' 
 'x+1/2, y+1/2, z' 
 'x+1/2, -y+1/2, z+1/2' 
 
_cell_length_a                    23.0407(12) 
_cell_length_b                    13.1043(7) 
_cell_length_c                    21.4908(11) 
_cell_angle_alpha                 90.00 
_cell_angle_beta                  114.0980(10) 
_cell_angle_gamma                 90.00 
_cell_volume                      5923.3(5) 
_cell_formula_units_Z             4 
_cell_measurement_temperature     273(2) 
_cell_measurement_reflns_used     ? 
_cell_measurement_theta_min       ? 
_cell_measurement_theta_max       ? 
 
_exptl_crystal_description        block 
_exptl_crystal_colour             colorless
_exptl_crystal_size_max           0.22 
_exptl_crystal_size_mid           0.17 
_exptl_crystal_size_min           0.14 
_exptl_crystal_density_meas       ? 
_exptl_crystal_density_diffrn     1.316 
_exptl_crystal_density_method     'not measured' 
_exptl_crystal_F_000              2440 
_exptl_absorpt_coefficient_mu     1.783 
_exptl_absorpt_correction_type    multi-scan 
_exptl_absorpt_correction_T_min   0.6951 
_exptl_absorpt_correction_T_max   0.7884 
_exptl_absorpt_process_details    ? 
 
_exptl_special_details 
; 
 ? 
; 
 
_diffrn_ambient_temperature       273(2) 
_diffrn_radiation_wavelength      0.71073 
_diffrn_radiation_type            MoK\a 
_diffrn_radiation_source          'fine-focus sealed tube' 
_diffrn_radiation_monochromator   graphite 
_diffrn_measurement_device_type   ? 
_diffrn_measurement_method        ? 
_diffrn_detector_area_resol_mean  ? 
_diffrn_standards_number          ? 
_diffrn_standards_interval_count  ? 
_diffrn_standards_interval_time   ? 
_diffrn_standards_decay_%         ? 
_diffrn_reflns_number             18681 
_diffrn_reflns_av_R_equivalents   0.0341 
_diffrn_reflns_av_sigmaI/netI     0.0596 
_diffrn_reflns_limit_h_min        -27 
_diffrn_reflns_limit_h_max        28 
_diffrn_reflns_limit_k_min        -16 
_diffrn_reflns_limit_k_max        16 
_diffrn_reflns_limit_l_min        -26 
_diffrn_reflns_limit_l_max        14 
_diffrn_reflns_theta_min          1.83 
_diffrn_reflns_theta_max          26.04 
_reflns_number_total              8619 
_reflns_number_gt                 8082 
_reflns_threshold_expression      >2sigma(I) 
 
_computing_data_collection        ? 
_computing_cell_refinement        ? 
_computing_data_reduction         ? 
_computing_structure_solution     'SHELXS-97 (Sheldrick, 1990)' 
_computing_structure_refinement   'SHELXL-97 (Sheldrick, 1997)' 
_computing_molecular_graphics     ? 
_computing_publication_material   ? 
 
_refine_special_details 
; 
 Refinement of F^2^ against ALL reflections.  The weighted R-factor wR and 
 goodness of fit S are based on F^2^, conventional R-factors R are based 
 on F, with F set to zero for negative F^2^. The threshold expression of 
 F^2^ > 2sigma(F^2^) is used only for calculating R-factors(gt) etc. and is 
 not relevant to the choice of reflections for refinement.  R-factors based 
 on F^2^ are statistically about twice as large as those based on F, and R- 
 factors based on ALL data will be even larger. 
; 
 
_refine_ls_structure_factor_coef  Fsqd  
_refine_ls_matrix_type            full 
_refine_ls_weighting_scheme       calc  
_refine_ls_weighting_details 
 'calc w=1/[\s^2^(Fo^2^)+(0.0028P)^2^+0.0000P] where P=(Fo^2^+2Fc^2^)/3' 
_atom_sites_solution_primary      direct 
_atom_sites_solution_secondary    difmap 
_atom_sites_solution_hydrogens    geom 
_refine_ls_hydrogen_treatment     mixed 
_refine_ls_extinction_method      none 
_refine_ls_extinction_coef        ? 
_refine_ls_abs_structure_details 
 'Flack H D (1983), Acta Cryst. A39, 876-881' 
_refine_ls_abs_structure_Flack    -0.007(5) 
_refine_ls_number_reflns          8619 
_refine_ls_number_parameters      664 
_refine_ls_number_restraints      2 
_refine_ls_R_factor_all           0.0313 
_refine_ls_R_factor_gt            0.0284 
_refine_ls_wR_factor_ref          0.0583 
_refine_ls_wR_factor_gt           0.0571 
_refine_ls_goodness_of_fit_ref    0.987 
_refine_ls_restrained_S_all       0.986 
_refine_ls_shift/su_max           0.001 
_refine_ls_shift/su_mean          0.000 
 
loop_ 
 _atom_site_label 
 _atom_site_type_symbol 
 _atom_site_fract_x 
 _atom_site_fract_y 
 _atom_site_fract_z 
 _atom_site_U_iso_or_equiv 
 _atom_site_adp_type 
 _atom_site_occupancy 
 _atom_site_symmetry_multiplicity 
 _atom_site_calc_flag 
 _atom_site_refinement_flags 
 _atom_site_disorder_assembly 
 _atom_site_disorder_group 
Lu1 Lu 0.747611(9) 0.218193(11) 0.749563(9) 0.02015(5) Uani 1 1 d . . . 
N1 N 0.64961(16) 0.1441(3) 0.71515(19) 0.0229(8) Uani 1 1 d . . . 
N2 N 0.69361(16) 0.1573(3) 0.62497(18) 0.0221(8) Uani 1 1 d . . . 
N3 N 0.75396(18) 0.3221(3) 0.6655(2) 0.0217(9) Uani 1 1 d . . . 
N4 N 0.76704(18) 0.3434(3) 0.8228(2) 0.0251(9) Uani 1 1 d . . . 
H4 H 0.7504 0.3963 0.7983 0.030 Uiso 1 1 calc R . . 
P1 P 0.62918(5) 0.13151(8) 0.63402(6) 0.0211(2) Uani 1 1 d . . . 
P2 P 0.72740(6) 0.24593(9) 0.60051(6) 0.0211(3) Uani 1 1 d . . . 
Si1 Si 0.87021(7) -0.01347(10) 0.80001(8) 0.0337(3) Uani 1 1 d . . . 
C1 C 0.8253(2) 0.0971(3) 0.8080(3) 0.0307(11) Uani 1 1 d . . . 
H1A H 0.8598 0.1414 0.8360 0.037 Uiso 1 1 calc R . . 
H1B H 0.8083 0.0702 0.8391 0.037 Uiso 1 1 calc R . . 
C2 C 0.9385(3) 0.0309(4) 0.7822(3) 0.0522(16) Uani 1 1 d . . . 
H2A H 0.9235 0.0760 0.7436 0.078 Uiso 1 1 calc R . . 
H2B H 0.9591 -0.0268 0.7724 0.078 Uiso 1 1 calc R . . 
H2C H 0.9683 0.0664 0.8212 0.078 Uiso 1 1 calc R . . 
C3 C 0.9083(3) -0.0933(5) 0.8793(3) 0.0604(18) Uani 1 1 d . . . 
H3A H 0.9396 -0.0534 0.9145 0.091 Uiso 1 1 calc R . . 
H3B H 0.9283 -0.1517 0.8695 0.091 Uiso 1 1 calc R . . 
H3C H 0.8764 -0.1155 0.8942 0.091 Uiso 1 1 calc R . . 
C4 C 0.8195(3) -0.1063(4) 0.7333(3) 0.0504(17) Uani 1 1 d . . . 
H4A H 0.7901 -0.1385 0.7483 0.076 Uiso 1 1 calc R . . 
H4B H 0.8462 -0.1572 0.7262 0.076 Uiso 1 1 calc R . . 
H4C H 0.7965 -0.0705 0.6914 0.076 Uiso 1 1 calc R . . 
C5 C 0.7930(2) 0.3793(3) 0.8893(2) 0.0247(10) Uani 1 1 d . . . 
C6 C 0.7883(3) 0.3188(4) 0.9421(3) 0.0291(12) Uani 1 1 d . . . 
C7 C 0.8124(3) 0.3567(5) 1.0083(3) 0.0411(16) Uani 1 1 d . . . 
H7 H 0.8074 0.3180 1.0421 0.049 Uiso 1 1 calc R . . 
C8 C 0.8429(3) 0.4481(4) 1.0258(3) 0.0429(14) Uani 1 1 d . . . 
H8 H 0.8593 0.4707 1.0707 0.052 Uiso 1 1 calc R . . 
C9 C 0.8489(2) 0.5066(4) 0.9754(3) 0.0354(12) Uani 1 1 d . . . 
H9 H 0.8700 0.5688 0.9871 0.043 Uiso 1 1 calc R . . 
C10 C 0.8246(2) 0.4755(4) 0.9074(3) 0.0262(11) Uani 1 1 d . . . 
C11 C 0.7558(3) 0.2151(4) 0.9300(3) 0.0349(12) Uani 1 1 d . . . 
H11 H 0.7430 0.1973 0.8819 0.042 Uiso 1 1 calc R . . 
C12 C 0.8009(3) 0.1338(4) 0.9726(3) 0.0611(18) Uani 1 1 d . . . 
H12A H 0.8365 0.1290 0.9604 0.092 Uiso 1 1 calc R . . 
H12B H 0.7793 0.0693 0.9646 0.092 Uiso 1 1 calc R . . 
H12C H 0.8157 0.1513 1.0200 0.092 Uiso 1 1 calc R . . 
C13 C 0.6965(4) 0.2156(5) 0.9444(5) 0.059(3) Uani 1 1 d . . . 
H13A H 0.6754 0.1509 0.9320 0.089 Uiso 1 1 calc R . . 
H13B H 0.6684 0.2687 0.9184 0.089 Uiso 1 1 calc R . . 
H13C H 0.7083 0.2277 0.9921 0.089 Uiso 1 1 calc R . . 
C14 C 0.9007(3) 0.5865(4) 0.8791(3) 0.0445(14) Uani 1 1 d . . . 
H14A H 0.9115 0.6283 0.9189 0.067 Uiso 1 1 calc R . . 
H14B H 0.9040 0.6262 0.8431 0.067 Uiso 1 1 calc R . . 
H14C H 0.9294 0.5296 0.8894 0.067 Uiso 1 1 calc R . . 
C15 C 0.7867(3) 0.6371(4) 0.8421(3) 0.0519(16) Uani 1 1 d . . . 
H15A H 0.7440 0.6116 0.8264 0.078 Uiso 1 1 calc R . . 
H15B H 0.7904 0.6801 0.8077 0.078 Uiso 1 1 calc R . . 
H15C H 0.7967 0.6758 0.8831 0.078 Uiso 1 1 calc R . . 
C16 C 0.8329(3) 0.5476(4) 0.8565(3) 0.0300(12) Uani 1 1 d . . . 
H16 H 0.8220 0.5101 0.8138 0.036 Uiso 1 1 calc R . . 
C17 C 0.7898(2) 0.4161(3) 0.6739(2) 0.0227(10) Uani 1 1 d . . . 
C18 C 0.7577(2) 0.5106(3) 0.6563(2) 0.0273(11) Uani 1 1 d . . . 
C19 C 0.7937(3) 0.6000(4) 0.6693(3) 0.0343(12) Uani 1 1 d . . . 
H19 H 0.7730 0.6627 0.6591 0.041 Uiso 1 1 calc R . . 
C20 C 0.8594(2) 0.5974(4) 0.6971(3) 0.0350(12) Uani 1 1 d . . . 
H20 H 0.8827 0.6575 0.7043 0.042 Uiso 1 1 calc R . . 
C21 C 0.8897(2) 0.5051(4) 0.7139(2) 0.0307(11) Uani 1 1 d . . . 
H21 H 0.9339 0.5034 0.7329 0.037 Uiso 1 1 calc R . . 
C22 C 0.8563(2) 0.4134(4) 0.7035(2) 0.0262(11) Uani 1 1 d . . . 
C23 C 0.8950(2) 0.3170(4) 0.7316(3) 0.0290(11) Uani 1 1 d . . . 
H23 H 0.8659 0.2587 0.7173 0.035 Uiso 1 1 calc R . . 
C24 C 0.9466(3) 0.3009(4) 0.7035(3) 0.0461(15) Uani 1 1 d . . . 
H24A H 0.9267 0.2955 0.6547 0.069 Uiso 1 1 calc R . . 
H24B H 0.9698 0.2393 0.7223 0.069 Uiso 1 1 calc R . . 
H24C H 0.9754 0.3578 0.7162 0.069 Uiso 1 1 calc R . . 
C25 C 0.9254(2) 0.3192(4) 0.8094(3) 0.0374(13) Uani 1 1 d . . . 
H25A H 0.9576 0.3711 0.8247 0.056 Uiso 1 1 calc R . . 
H25B H 0.9443 0.2541 0.8263 0.056 Uiso 1 1 calc R . . 
H25C H 0.8935 0.3338 0.8260 0.056 Uiso 1 1 calc R . . 
C26 C 0.6853(2) 0.5188(4) 0.6275(3) 0.0307(12) Uani 1 1 d . . . 
H26 H 0.6679 0.4550 0.6032 0.037 Uiso 1 1 calc R . . 
C27 C 0.6593(3) 0.6064(4) 0.5757(3) 0.0539(17) Uani 1 1 d . . . 
H27A H 0.6701 0.6706 0.5992 0.081 Uiso 1 1 calc R . . 
H27B H 0.6140 0.6007 0.5527 0.081 Uiso 1 1 calc R . . 
H27C H 0.6777 0.6026 0.5430 0.081 Uiso 1 1 calc R . . 
C28 C 0.6616(3) 0.5291(4) 0.6831(3) 0.0451(14) Uani 1 1 d . . . 
H28A H 0.6744 0.4704 0.7123 0.068 Uiso 1 1 calc R . . 
H28B H 0.6160 0.5339 0.6630 0.068 Uiso 1 1 calc R . . 
H28C H 0.6793 0.5895 0.7093 0.068 Uiso 1 1 calc R . . 
C29 C 0.7896(2) 0.1855(4) 0.5819(3) 0.0250(11) Uani 1 1 d . . . 
C30 C 0.8154(2) 0.0945(4) 0.6135(3) 0.0346(12) Uani 1 1 d . . . 
H30 H 0.8006 0.0645 0.6435 0.041 Uiso 1 1 calc R . . 
C31 C 0.8633(3) 0.0480(4) 0.6006(3) 0.0482(15) Uani 1 1 d . . . 
H31 H 0.8800 -0.0139 0.6214 0.058 Uiso 1 1 calc R . . 
C32 C 0.8862(3) 0.0919(4) 0.5576(3) 0.0448(14) Uani 1 1 d . . . 
H32 H 0.9182 0.0598 0.5490 0.054 Uiso 1 1 calc R . . 
C33 C 0.8623(3) 0.1823(4) 0.5274(3) 0.0459(14) Uani 1 1 d . . . 
H33 H 0.8787 0.2131 0.4990 0.055 Uiso 1 1 calc R . . 
C34 C 0.8135(4) 0.2292(5) 0.5385(4) 0.0398(17) Uani 1 1 d . . . 
H34 H 0.7967 0.2905 0.5168 0.048 Uiso 1 1 calc R . . 
C35 C 0.6793(2) 0.3035(4) 0.5183(3) 0.0237(11) Uani 1 1 d . . . 
C36 C 0.6973(3) 0.3954(4) 0.4996(3) 0.0350(15) Uani 1 1 d . . . 
H36 H 0.7308 0.4323 0.5313 0.042 Uiso 1 1 calc R . . 
C37 C 0.6659(3) 0.4325(4) 0.4343(3) 0.0425(14) Uani 1 1 d . . . 
H37 H 0.6782 0.4943 0.4222 0.051 Uiso 1 1 calc R . . 
C38 C 0.6167(3) 0.3790(4) 0.3873(3) 0.0429(14) Uani 1 1 d . . . 
H38 H 0.5954 0.4047 0.3435 0.051 Uiso 1 1 calc R . . 
C39 C 0.5984(2) 0.2859(4) 0.4050(3) 0.0374(12) Uani 1 1 d . . . 
H39 H 0.5648 0.2497 0.3729 0.045 Uiso 1 1 calc R . . 
C40 C 0.6299(2) 0.2474(4) 0.4698(3) 0.0291(11) Uani 1 1 d . . . 
H40 H 0.6183 0.1845 0.4812 0.035 Uiso 1 1 calc R . . 
C41 C 0.5645(2) 0.2124(3) 0.5800(2) 0.0237(10) Uani 1 1 d . . . 
C42 C 0.5738(2) 0.3179(3) 0.5854(3) 0.0304(11) Uani 1 1 d . . . 
H42 H 0.6113 0.3437 0.6184 0.036 Uiso 1 1 calc R . . 
C43 C 0.5288(2) 0.3848(4) 0.5431(3) 0.0398(13) Uani 1 1 d . . . 
H43 H 0.5358 0.4549 0.5477 0.048 Uiso 1 1 calc R . . 
C44 C 0.4735(3) 0.3466(5) 0.4941(3) 0.0466(15) Uani 1 1 d . . . 
H44 H 0.4434 0.3911 0.4646 0.056 Uiso 1 1 calc R . . 
C45 C 0.4622(3) 0.2439(4) 0.4881(3) 0.0409(14) Uani 1 1 d . . . 
H45 H 0.4237 0.2190 0.4562 0.049 Uiso 1 1 calc R . . 
C46 C 0.5084(2) 0.1766(4) 0.5297(3) 0.0347(13) Uani 1 1 d . . . 
H46 H 0.5016 0.1067 0.5236 0.042 Uiso 1 1 calc R . . 
C47 C 0.6002(2) 0.0064(3) 0.6012(2) 0.0237(10) Uani 1 1 d . . . 
C48 C 0.6245(2) -0.0479(3) 0.5620(3) 0.0326(12) Uani 1 1 d . . . 
H48 H 0.6600 -0.0236 0.5566 0.039 Uiso 1 1 calc R . . 
C49 C 0.5965(3) -0.1377(4) 0.5309(3) 0.0446(14) Uani 1 1 d . . . 
H49 H 0.6134 -0.1739 0.5050 0.054 Uiso 1 1 calc R . . 
C50 C 0.5438(3) -0.1737(4) 0.5381(3) 0.0407(13) Uani 1 1 d . . . 
H50 H 0.5245 -0.2335 0.5161 0.049 Uiso 1 1 calc R . . 
C51 C 0.5193(2) -0.1226(4) 0.5773(3) 0.0353(12) Uani 1 1 d . . . 
H51 H 0.4841 -0.1486 0.5827 0.042 Uiso 1 1 calc R . . 
C52 C 0.5466(2) -0.0325(4) 0.6091(3) 0.0330(12) Uani 1 1 d . . . 
H52 H 0.5298 0.0023 0.6356 0.040 Uiso 1 1 calc R . . 
C53 C 0.6148(2) 0.1125(3) 0.7544(2) 0.0259(10) Uani 1 1 d . . . 
C54 C 0.6250(2) 0.0156(3) 0.7854(2) 0.0249(10) Uani 1 1 d . . . 
C55 C 0.5930(2) -0.0089(4) 0.8265(3) 0.0380(13) Uani 1 1 d . . . 
H55 H 0.5997 -0.0726 0.8473 0.046 Uiso 1 1 calc R . . 
C56 C 0.5520(2) 0.0582(4) 0.8370(3) 0.0382(13) Uani 1 1 d . . . 
H56 H 0.5309 0.0400 0.8642 0.046 Uiso 1 1 calc R . . 
C57 C 0.5427(2) 0.1522(4) 0.8069(3) 0.0372(13) Uani 1 1 d . . . 
H57 H 0.5154 0.1978 0.8145 0.045 Uiso 1 1 calc R . . 
C58 C 0.5726(2) 0.1818(4) 0.7655(3) 0.0286(11) Uani 1 1 d . . . 
C59 C 0.5613(3) 0.2892(4) 0.7354(3) 0.0357(12) Uani 1 1 d . . . 
H59 H 0.5851 0.2950 0.7067 0.043 Uiso 1 1 calc R . . 
C60 C 0.4907(3) 0.3051(4) 0.6889(3) 0.0518(16) Uani 1 1 d . . . 
H60A H 0.4660 0.3008 0.7155 0.078 Uiso 1 1 calc R . . 
H60B H 0.4771 0.2533 0.6543 0.078 Uiso 1 1 calc R . . 
H60C H 0.4850 0.3711 0.6678 0.078 Uiso 1 1 calc R . . 
C61 C 0.5860(3) 0.3712(4) 0.7894(3) 0.0510(16) Uani 1 1 d . . . 
H61A H 0.5670 0.3632 0.8214 0.077 Uiso 1 1 calc R . . 
H61B H 0.5754 0.4371 0.7684 0.077 Uiso 1 1 calc R . . 
H61C H 0.6314 0.3653 0.8129 0.077 Uiso 1 1 calc R . . 
C62 C 0.6717(3) -0.0634(4) 0.7807(3) 0.0349(13) Uani 1 1 d . . . 
H62 H 0.6917 -0.0350 0.7521 0.042 Uiso 1 1 calc R . . 
C63 C 0.7242(2) -0.0853(4) 0.8512(3) 0.0459(14) Uani 1 1 d . . . 
H63A H 0.7070 -0.1243 0.8775 0.069 Uiso 1 1 calc R . . 
H63B H 0.7408 -0.0220 0.8740 0.069 Uiso 1 1 calc R . . 
H63C H 0.7577 -0.1232 0.8462 0.069 Uiso 1 1 calc R . . 
C64 C 0.6413(3) -0.1653(4) 0.7497(3) 0.0521(16) Uani 1 1 d . . . 
H64A H 0.6733 -0.2102 0.7475 0.078 Uiso 1 1 calc R . . 
H64B H 0.6092 -0.1541 0.7047 0.078 Uiso 1 1 calc R . . 
H64C H 0.6223 -0.1955 0.7776 0.078 Uiso 1 1 calc R . . 
 
loop_ 
 _atom_site_aniso_label 
 _atom_site_aniso_U_11 
 _atom_site_aniso_U_22 
 _atom_site_aniso_U_33 
 _atom_site_aniso_U_23 
 _atom_site_aniso_U_13 
 _atom_site_aniso_U_12 
Lu1 0.02018(8) 0.02053(8) 0.01955(9) -0.00038(12) 0.00790(6) -0.00116(12) 
N1 0.022(2) 0.0209(18) 0.025(2) -0.0021(16) 0.0085(17) -0.0016(15) 
N2 0.0205(19) 0.0223(19) 0.023(2) 0.0001(16) 0.0076(17) 0.0008(15) 
N3 0.022(2) 0.0202(19) 0.024(2) -0.0004(17) 0.0111(19) -0.0015(16) 
N4 0.029(2) 0.021(2) 0.021(2) 0.0013(17) 0.0059(19) 0.0019(17) 
P1 0.0203(6) 0.0213(6) 0.0222(7) -0.0005(5) 0.0091(5) -0.0008(5) 
P2 0.0196(6) 0.0241(6) 0.0191(7) 0.0004(5) 0.0075(5) -0.0010(5) 
Si1 0.0350(8) 0.0271(7) 0.0382(9) 0.0016(6) 0.0139(7) 0.0054(6) 
C1 0.030(3) 0.030(3) 0.031(3) -0.001(2) 0.011(2) -0.004(2) 
C2 0.050(4) 0.044(3) 0.070(5) -0.008(3) 0.033(3) 0.007(3) 
C3 0.064(4) 0.051(4) 0.054(4) 0.008(3) 0.011(3) 0.018(3) 
C4 0.063(4) 0.037(4) 0.046(4) -0.001(3) 0.017(3) -0.007(3) 
C5 0.021(2) 0.029(2) 0.023(3) -0.003(2) 0.008(2) 0.0028(19) 
C6 0.032(3) 0.030(3) 0.031(3) -0.004(2) 0.019(3) -0.003(2) 
C7 0.054(4) 0.047(4) 0.023(3) -0.001(3) 0.016(3) -0.014(3) 
C8 0.063(4) 0.040(3) 0.022(3) -0.007(2) 0.014(3) -0.005(3) 
C9 0.042(3) 0.035(3) 0.027(3) -0.008(2) 0.013(3) -0.010(2) 
C10 0.028(3) 0.028(3) 0.024(3) -0.005(2) 0.011(2) 0.000(2) 
C11 0.049(4) 0.035(3) 0.029(3) -0.002(2) 0.024(3) -0.002(2) 
C12 0.068(4) 0.042(4) 0.056(4) 0.011(3) 0.008(4) 0.000(3) 
C13 0.047(5) 0.065(5) 0.068(7) -0.017(4) 0.026(4) -0.033(4) 
C14 0.050(3) 0.054(3) 0.036(3) -0.005(3) 0.024(3) -0.017(3) 
C15 0.072(4) 0.039(3) 0.042(4) 0.006(3) 0.021(3) 0.010(3) 
C16 0.040(3) 0.028(3) 0.026(3) -0.007(2) 0.017(3) -0.004(2) 
C17 0.028(3) 0.024(2) 0.018(2) -0.0034(19) 0.010(2) -0.0032(19) 
C18 0.034(3) 0.023(2) 0.026(3) -0.002(2) 0.014(2) -0.004(2) 
C19 0.050(3) 0.023(2) 0.029(3) 0.003(2) 0.015(3) 0.001(2) 
C20 0.049(3) 0.027(3) 0.032(3) -0.004(2) 0.020(3) -0.019(2) 
C21 0.026(3) 0.043(3) 0.024(3) -0.005(2) 0.011(2) -0.009(2) 
C22 0.032(3) 0.030(2) 0.017(3) 0.000(2) 0.011(2) -0.007(2) 
C23 0.024(3) 0.032(3) 0.030(3) -0.002(2) 0.010(2) -0.005(2) 
C24 0.037(3) 0.057(4) 0.051(4) -0.004(3) 0.025(3) -0.003(3) 
C25 0.031(3) 0.043(3) 0.031(3) 0.004(2) 0.004(2) 0.003(2) 
C26 0.033(3) 0.025(3) 0.033(3) 0.005(2) 0.013(3) 0.000(2) 
C27 0.048(4) 0.033(3) 0.066(5) 0.016(3) 0.008(3) 0.003(3) 
C28 0.044(3) 0.036(3) 0.058(4) -0.005(3) 0.024(3) 0.004(3) 
C29 0.024(3) 0.026(2) 0.025(3) -0.008(2) 0.010(2) -0.007(2) 
C30 0.035(3) 0.037(3) 0.040(3) 0.005(2) 0.024(3) 0.005(2) 
C31 0.055(4) 0.038(3) 0.054(4) 0.000(3) 0.025(3) 0.014(3) 
C32 0.039(3) 0.060(4) 0.044(4) -0.016(3) 0.025(3) 0.006(3) 
C33 0.048(3) 0.052(3) 0.053(4) 0.000(3) 0.035(3) -0.001(3) 
C34 0.045(4) 0.044(3) 0.038(4) 0.004(3) 0.025(3) 0.006(3) 
C35 0.026(3) 0.025(3) 0.021(3) 0.001(2) 0.011(2) 0.005(2) 
C36 0.038(3) 0.034(3) 0.033(4) -0.003(3) 0.014(3) -0.004(3) 
C37 0.054(4) 0.036(3) 0.034(3) 0.014(3) 0.014(3) 0.006(3) 
C38 0.044(3) 0.051(3) 0.024(3) 0.009(3) 0.004(3) 0.010(3) 
C39 0.031(3) 0.048(3) 0.028(3) -0.005(3) 0.007(2) 0.003(2) 
C40 0.028(3) 0.034(3) 0.027(3) -0.001(2) 0.013(2) -0.003(2) 
C41 0.019(2) 0.029(2) 0.021(3) 0.000(2) 0.007(2) 0.0037(19) 
C42 0.028(3) 0.031(2) 0.030(3) 0.000(2) 0.009(2) 0.000(2) 
C43 0.040(3) 0.031(3) 0.045(4) 0.004(2) 0.013(3) 0.004(2) 
C44 0.036(3) 0.048(4) 0.045(4) 0.014(3) 0.006(3) 0.012(3) 
C45 0.029(3) 0.051(3) 0.032(3) 0.001(3) 0.001(3) 0.004(2) 
C46 0.031(3) 0.037(3) 0.030(3) -0.003(2) 0.006(2) 0.001(2) 
C47 0.021(2) 0.024(2) 0.022(3) -0.0019(19) 0.003(2) -0.0017(18) 
C48 0.032(3) 0.026(2) 0.042(3) -0.001(2) 0.017(3) 0.000(2) 
C49 0.054(4) 0.030(3) 0.052(4) -0.011(3) 0.023(3) 0.004(3) 
C50 0.041(3) 0.026(3) 0.046(4) -0.003(2) 0.009(3) -0.006(2) 
C51 0.033(3) 0.034(3) 0.035(3) 0.004(2) 0.009(2) -0.012(2) 
C52 0.030(3) 0.036(3) 0.032(3) 0.000(2) 0.012(2) -0.007(2) 
C53 0.023(2) 0.032(3) 0.021(3) -0.003(2) 0.008(2) -0.005(2) 
C54 0.026(2) 0.026(2) 0.023(3) -0.002(2) 0.010(2) -0.008(2) 
C55 0.041(3) 0.041(3) 0.031(3) 0.000(2) 0.014(3) -0.014(2) 
C56 0.033(3) 0.054(3) 0.036(3) -0.005(3) 0.022(3) -0.017(3) 
C57 0.029(3) 0.048(3) 0.039(3) -0.012(3) 0.020(3) -0.007(2) 
C58 0.028(3) 0.032(3) 0.029(3) -0.006(2) 0.014(2) -0.004(2) 
C59 0.038(3) 0.034(3) 0.041(4) -0.005(3) 0.022(3) 0.009(2) 
C60 0.047(4) 0.056(4) 0.055(4) -0.001(3) 0.023(3) 0.014(3) 
C61 0.058(4) 0.036(3) 0.066(5) -0.008(3) 0.033(4) -0.003(3) 
C62 0.041(3) 0.030(3) 0.035(3) 0.006(3) 0.018(3) -0.003(3) 
C63 0.038(3) 0.047(3) 0.044(4) 0.010(3) 0.009(3) 0.002(3) 
C64 0.061(4) 0.030(3) 0.055(4) -0.005(3) 0.014(3) 0.006(3) 
 
_geom_special_details 
; 
 All esds (except the esd in the dihedral angle between two l.s. planes) 
 are estimated using the full covariance matrix.  The cell esds are taken 
 into account individually in the estimation of esds in distances, angles 
 and torsion angles; correlations between esds in cell parameters are only 
 used when they are defined by crystal symmetry.  An approximate (isotropic) 
 treatment of cell esds is used for estimating esds involving l.s. planes. 
; 
 
loop_ 
 _geom_bond_atom_site_label_1 
 _geom_bond_atom_site_label_2 
 _geom_bond_distance 
 _geom_bond_site_symmetry_2 
 _geom_bond_publ_flag 
Lu1 N4 2.190(4) . ? 
Lu1 N1 2.286(3) . ? 
Lu1 N3 2.315(4) . ? 
Lu1 C1 2.337(5) . ? 
Lu1 N2 2.576(4) . ? 
N1 C53 1.441(6) . ? 
N1 P1 1.618(4) . ? 
N2 P2 1.602(4) . ? 
N2 P1 1.610(4) . ? 
N3 C17 1.452(5) . ? 
N3 P2 1.620(4) . ? 
N4 C5 1.387(6) . ? 
P1 C47 1.802(4) . ? 
P1 C41 1.811(4) . ? 
P2 C29 1.820(5) . ? 
P2 C35 1.821(5) . ? 
Si1 C1 1.828(5) . ? 
Si1 C2 1.859(6) . ? 
Si1 C4 1.878(6) . ? 
Si1 C3 1.883(6) . ? 
C5 C6 1.425(7) . ? 
C5 C10 1.428(6) . ? 
C6 C7 1.392(8) . ? 
C6 C11 1.521(7) . ? 
C7 C8 1.362(8) . ? 
C8 C9 1.379(7) . ? 
C9 C10 1.395(7) . ? 
C10 C16 1.516(7) . ? 
C11 C12 1.509(7) . ? 
C11 C13 1.520(9) . ? 
C14 C16 1.522(7) . ? 
C15 C16 1.528(7) . ? 
C17 C22 1.399(6) . ? 
C17 C18 1.412(6) . ? 
C18 C19 1.397(6) . ? 
C18 C26 1.527(7) . ? 
C19 C20 1.383(7) . ? 
C20 C21 1.370(7) . ? 
C21 C22 1.395(6) . ? 
C22 C23 1.523(7) . ? 
C23 C25 1.526(7) . ? 
C23 C24 1.552(7) . ? 
C26 C28 1.510(7) . ? 
C26 C27 1.540(7) . ? 
C29 C30 1.380(7) . ? 
C29 C34 1.384(8) . ? 
C30 C31 1.385(7) . ? 
C31 C32 1.366(8) . ? 
C32 C33 1.355(8) . ? 
C33 C34 1.385(8) . ? 
C35 C36 1.386(7) . ? 
C35 C40 1.398(7) . ? 
C36 C37 1.379(8) . ? 
C37 C38 1.363(7) . ? 
C38 C39 1.393(7) . ? 
C39 C40 1.376(7) . ? 
C41 C46 1.386(7) . ? 
C41 C42 1.396(6) . ? 
C42 C43 1.378(7) . ? 
C43 C44 1.376(8) . ? 
C44 C45 1.367(8) . ? 
C45 C46 1.390(7) . ? 
C47 C48 1.382(6) . ? 
C47 C52 1.410(6) . ? 
C48 C49 1.376(7) . ? 
C49 C50 1.368(7) . ? 
C50 C51 1.366(7) . ? 
C51 C52 1.380(7) . ? 
C53 C54 1.408(6) . ? 
C53 C58 1.420(6) . ? 
C54 C55 1.400(6) . ? 
C54 C62 1.524(7) . ? 
C55 C56 1.376(7) . ? 
C56 C57 1.366(7) . ? 
C57 C58 1.384(7) . ? 
C58 C59 1.527(7) . ? 
C59 C61 1.512(8) . ? 
C59 C60 1.536(8) . ? 
C62 C64 1.528(7) . ? 
C62 C63 1.531(7) . ? 
 
loop_ 
 _geom_angle_atom_site_label_1 
 _geom_angle_atom_site_label_2 
 _geom_angle_atom_site_label_3 
 _geom_angle 
 _geom_angle_site_symmetry_1 
 _geom_angle_site_symmetry_3 
 _geom_angle_publ_flag 
N4 Lu1 N1 115.85(14) . . ? 
N4 Lu1 N3 93.46(14) . . ? 
N1 Lu1 N3 111.50(13) . . ? 
N4 Lu1 C1 103.65(16) . . ? 
N1 Lu1 C1 108.89(15) . . ? 
N3 Lu1 C1 122.70(15) . . ? 
N4 Lu1 N2 148.17(13) . . ? 
N1 Lu1 N2 62.48(12) . . ? 
N3 Lu1 N2 61.88(12) . . ? 
C1 Lu1 N2 106.65(14) . . ? 
C53 N1 P1 128.0(3) . . ? 
C53 N1 Lu1 130.1(3) . . ? 
P1 N1 Lu1 101.89(17) . . ? 
P2 N2 P1 141.9(2) . . ? 
P2 N2 Lu1 91.32(15) . . ? 
P1 N2 Lu1 91.00(16) . . ? 
C17 N3 P2 128.7(3) . . ? 
C17 N3 Lu1 128.0(3) . . ? 
P2 N3 Lu1 100.84(18) . . ? 
C5 N4 Lu1 150.5(3) . . ? 
N2 P1 N1 103.41(19) . . ? 
N2 P1 C47 110.8(2) . . ? 
N1 P1 C47 114.4(2) . . ? 
N2 P1 C41 111.0(2) . . ? 
N1 P1 C41 115.6(2) . . ? 
C47 P1 C41 101.9(2) . . ? 
N2 P2 N3 103.1(2) . . ? 
N2 P2 C29 106.8(2) . . ? 
N3 P2 C29 113.8(2) . . ? 
N2 P2 C35 115.7(2) . . ? 
N3 P2 C35 116.5(2) . . ? 
C29 P2 C35 100.9(2) . . ? 
C1 Si1 C2 109.3(2) . . ? 
C1 Si1 C4 112.6(3) . . ? 
C2 Si1 C4 111.1(3) . . ? 
C1 Si1 C3 115.3(3) . . ? 
C2 Si1 C3 103.8(3) . . ? 
C4 Si1 C3 104.2(3) . . ? 
Si1 C1 Lu1 145.7(3) . . ? 
N4 C5 C6 119.4(4) . . ? 
N4 C5 C10 122.5(4) . . ? 
C6 C5 C10 118.0(4) . . ? 
C7 C6 C5 119.2(5) . . ? 
C7 C6 C11 117.2(5) . . ? 
C5 C6 C11 123.6(5) . . ? 
C8 C7 C6 122.8(6) . . ? 
C7 C8 C9 118.6(5) . . ? 
C8 C9 C10 122.3(5) . . ? 
C9 C10 C5 119.1(5) . . ? 
C9 C10 C16 117.3(4) . . ? 
C5 C10 C16 123.6(4) . . ? 
C12 C11 C13 109.5(5) . . ? 
C12 C11 C6 111.0(5) . . ? 
C13 C11 C6 112.4(4) . . ? 
C10 C16 C14 113.3(4) . . ? 
C10 C16 C15 110.0(4) . . ? 
C14 C16 C15 110.3(4) . . ? 
C22 C17 C18 120.0(4) . . ? 
C22 C17 N3 119.8(4) . . ? 
C18 C17 N3 120.0(4) . . ? 
C19 C18 C17 118.6(4) . . ? 
C19 C18 C26 118.9(4) . . ? 
C17 C18 C26 122.4(4) . . ? 
C20 C19 C18 121.4(5) . . ? 
C21 C20 C19 119.1(4) . . ? 
C20 C21 C22 121.9(5) . . ? 
C21 C22 C17 118.8(4) . . ? 
C21 C22 C23 117.0(4) . . ? 
C17 C22 C23 123.9(4) . . ? 
C22 C23 C25 110.6(4) . . ? 
C22 C23 C24 112.2(4) . . ? 
C25 C23 C24 110.3(5) . . ? 
C28 C26 C18 111.9(5) . . ? 
C28 C26 C27 110.2(5) . . ? 
C18 C26 C27 112.5(4) . . ? 
C30 C29 C34 118.7(5) . . ? 
C30 C29 P2 119.1(4) . . ? 
C34 C29 P2 122.2(5) . . ? 
C29 C30 C31 119.9(5) . . ? 
C32 C31 C30 120.7(5) . . ? 
C33 C32 C31 119.9(5) . . ? 
C32 C33 C34 120.4(6) . . ? 
C29 C34 C33 120.4(6) . . ? 
C36 C35 C40 119.3(5) . . ? 
C36 C35 P2 120.4(4) . . ? 
C40 C35 P2 119.6(4) . . ? 
C37 C36 C35 120.5(5) . . ? 
C38 C37 C36 120.3(5) . . ? 
C37 C38 C39 120.0(5) . . ? 
C40 C39 C38 120.3(5) . . ? 
C39 C40 C35 119.6(5) . . ? 
C46 C41 C42 117.5(4) . . ? 
C46 C41 P1 124.3(4) . . ? 
C42 C41 P1 117.9(3) . . ? 
C43 C42 C41 121.8(5) . . ? 
C44 C43 C42 119.0(5) . . ? 
C45 C44 C43 120.8(5) . . ? 
C44 C45 C46 119.8(5) . . ? 
C41 C46 C45 120.9(5) . . ? 
C48 C47 C52 118.6(4) . . ? 
C48 C47 P1 122.0(3) . . ? 
C52 C47 P1 118.9(4) . . ? 
C49 C48 C47 120.7(5) . . ? 
C50 C49 C48 120.1(5) . . ? 
C51 C50 C49 120.6(5) . . ? 
C50 C51 C52 120.3(5) . . ? 
C51 C52 C47 119.6(5) . . ? 
C54 C53 C58 119.4(4) . . ? 
C54 C53 N1 120.7(4) . . ? 
C58 C53 N1 119.8(4) . . ? 
C55 C54 C53 118.4(4) . . ? 
C55 C54 C62 116.9(4) . . ? 
C53 C54 C62 124.6(4) . . ? 
C56 C55 C54 122.1(5) . . ? 
C57 C56 C55 118.9(5) . . ? 
C56 C57 C58 122.3(5) . . ? 
C57 C58 C53 118.9(5) . . ? 
C57 C58 C59 119.2(5) . . ? 
C53 C58 C59 121.9(4) . . ? 
C61 C59 C58 112.5(5) . . ? 
C61 C59 C60 111.7(4) . . ? 
C58 C59 C60 110.7(5) . . ? 
C54 C62 C64 114.3(4) . . ? 
C54 C62 C63 110.9(5) . . ? 
C64 C62 C63 107.7(4) . . ? 
 
_diffrn_measured_fraction_theta_max    0.996 
_diffrn_reflns_theta_full              26.04 
_diffrn_measured_fraction_theta_full   0.996 
_refine_diff_density_max    1.174 
_refine_diff_density_min   -0.370 
_refine_diff_density_rms    0.074 

#===========END============= 


data_11 
 
_audit_creation_method            SHELXL-97 
_chemical_name_systematic 
; 
 ? 
; 
_chemical_name_common             ? 
_chemical_melting_point           ? 
_chemical_formula_moiety          ? 
_chemical_formula_sum 
 'C72 H90 N5 O0 P2 Si0 Y' 
_chemical_formula_weight          1176.34 
 
loop_ 
 _atom_type_symbol 
 _atom_type_description 
 _atom_type_scat_dispersion_real 
 _atom_type_scat_dispersion_imag 
 _atom_type_scat_source 
 'C'  'C'   0.0033   0.0016 
 'International Tables Vol C Tables 4.2.6.8 and 6.1.1.4' 
 'H'  'H'   0.0000   0.0000 
 'International Tables Vol C Tables 4.2.6.8 and 6.1.1.4' 
 'N'  'N'   0.0061   0.0033 
 'International Tables Vol C Tables 4.2.6.8 and 6.1.1.4' 
 'O'  'O'   0.0106   0.0060 
 'International Tables Vol C Tables 4.2.6.8 and 6.1.1.4' 
 'Si'  'Si'   0.0817   0.0704 
 'International Tables Vol C Tables 4.2.6.8 and 6.1.1.4' 
 'P'  'P'   0.1023   0.0942 
 'International Tables Vol C Tables 4.2.6.8 and 6.1.1.4' 
 'Y'  'Y'  -2.7962   3.5667 
 'International Tables Vol C Tables 4.2.6.8 and 6.1.1.4' 
 
_symmetry_cell_setting            monoclinic
_symmetry_space_group_name_H-M    P2(1)/n
 
loop_ 
 _symmetry_equiv_pos_as_xyz 
 'x, y, z' 
 '-x+1/2, y+1/2, -z+1/2' 
 '-x, -y, -z' 
 'x-1/2, -y-1/2, z-1/2' 
 
_cell_length_a                    13.3417(8) 
_cell_length_b                    23.5568(13) 
_cell_length_c                    22.3531(13) 
_cell_angle_alpha                 90.00 
_cell_angle_beta                  94.2320(10) 
_cell_angle_gamma                 90.00 
_cell_volume                      7006.1(7) 
_cell_formula_units_Z             4 
_cell_measurement_temperature     273(2) 
_cell_measurement_reflns_used     ? 
_cell_measurement_theta_min       ? 
_cell_measurement_theta_max       ? 
 
_exptl_crystal_description        ? 
_exptl_crystal_colour             ? 
_exptl_crystal_size_max           0.21 
_exptl_crystal_size_mid           0.19 
_exptl_crystal_size_min           0.14 
_exptl_crystal_density_meas       ? 
_exptl_crystal_density_diffrn     1.115 
_exptl_crystal_density_method     'not measured' 
_exptl_crystal_F_000              2504 
_exptl_absorpt_coefficient_mu     0.919 
_exptl_absorpt_correction_type    multi-scan
_exptl_absorpt_correction_T_min   0.8304 
_exptl_absorpt_correction_T_max   0.8821 
_exptl_absorpt_process_details    ? 
 
_exptl_special_details 
; 
 ? 
; 
 
_diffrn_ambient_temperature       273(2) 
_diffrn_radiation_wavelength      0.71073 
_diffrn_radiation_type            MoK\a 
_diffrn_radiation_source          'fine-focus sealed tube' 
_diffrn_radiation_monochromator   graphite 
_diffrn_measurement_device_type   ? 
_diffrn_measurement_method        ? 
_diffrn_detector_area_resol_mean  ? 
_diffrn_standards_number          ? 
_diffrn_standards_interval_count  ? 
_diffrn_standards_interval_time   ? 
_diffrn_standards_decay_%         ? 
_diffrn_reflns_number             40176 
_diffrn_reflns_av_R_equivalents   0.0749 
_diffrn_reflns_av_sigmaI/netI     0.0881 
_diffrn_reflns_limit_h_min        -15 
_diffrn_reflns_limit_h_max        15 
_diffrn_reflns_limit_k_min        -28 
_diffrn_reflns_limit_k_max        28 
_diffrn_reflns_limit_l_min        -26 
_diffrn_reflns_limit_l_max        23 
_diffrn_reflns_theta_min          1.72 
_diffrn_reflns_theta_max          25.07 
_reflns_number_total              12414 
_reflns_number_gt                 8170 
_reflns_threshold_expression      >2sigma(I) 
 
_computing_data_collection        ? 
_computing_cell_refinement        ? 
_computing_data_reduction         ? 
_computing_structure_solution     'SHELXS-97 (Sheldrick, 1990)' 
_computing_structure_refinement   'SHELXL-97 (Sheldrick, 1997)' 
_computing_molecular_graphics     ? 
_computing_publication_material   ? 
 
_refine_special_details 
; 
 Refinement of F^2^ against ALL reflections.  The weighted R-factor wR and 
 goodness of fit S are based on F^2^, conventional R-factors R are based 
 on F, with F set to zero for negative F^2^. The threshold expression of 
 F^2^ > 2sigma(F^2^) is used only for calculating R-factors(gt) etc. and is 
 not relevant to the choice of reflections for refinement.  R-factors based 
 on F^2^ are statistically about twice as large as those based on F, and R- 
 factors based on ALL data will be even larger. 
; 
 
_refine_ls_structure_factor_coef  Fsqd  
_refine_ls_matrix_type            full 
_refine_ls_weighting_scheme       calc  
_refine_ls_weighting_details 
 'calc w=1/[\s^2^(Fo^2^)+(0.0729P)^2^+0.0000P] where P=(Fo^2^+2Fc^2^)/3' 
_atom_sites_solution_primary      direct 
_atom_sites_solution_secondary    difmap 
_atom_sites_solution_hydrogens    geom 
_refine_ls_hydrogen_treatment     constr 
_refine_ls_extinction_method      none 
_refine_ls_extinction_coef        ? 
_refine_ls_number_reflns          12414 
_refine_ls_number_parameters      761 
_refine_ls_number_restraints      0 
_refine_ls_R_factor_all           0.1006 
_refine_ls_R_factor_gt            0.0573 
_refine_ls_wR_factor_ref          0.1456 
_refine_ls_wR_factor_gt           0.1263 
_refine_ls_goodness_of_fit_ref    0.996 
_refine_ls_restrained_S_all       0.996 
_refine_ls_shift/su_max           0.002 
_refine_ls_shift/su_mean          0.000 
 
loop_ 
 _atom_site_label 
 _atom_site_type_symbol 
 _atom_site_fract_x 
 _atom_site_fract_y 
 _atom_site_fract_z 
 _atom_site_U_iso_or_equiv 
 _atom_site_adp_type 
 _atom_site_occupancy 
 _atom_site_symmetry_multiplicity 
 _atom_site_calc_flag 
 _atom_site_refinement_flags 
 _atom_site_disorder_assembly 
 _atom_site_disorder_group 
Y1 Y 0.62558(2) 0.831877(14) 0.814522(16) 0.02421(12) Uani 1 1 d . . . 
P2 P 0.80513(7) 0.81911(4) 0.91024(4) 0.0243(2) Uani 1 1 d . . . 
P1 P 0.84312(7) 0.85482(4) 0.77841(4) 0.0240(2) Uani 1 1 d . . . 
N2 N 0.8099(2) 0.83518(12) 0.84154(13) 0.0260(7) Uani 1 1 d . . . 
N3 N 0.6871(2) 0.82603(11) 0.91895(13) 0.0238(7) Uani 1 1 d . . . 
C54 C 0.9955(3) 0.83237(17) 0.70338(18) 0.0372(10) Uani 1 1 d . . . 
H54 H 0.9616 0.8565 0.6758 0.045 Uiso 1 1 calc R . . 
C69 C 0.7456(3) 0.83204(15) 0.67296(16) 0.0267(8) Uani 1 1 d . . . 
N4 N 0.5428(2) 0.75072(12) 0.80469(14) 0.0341(8) Uani 1 1 d . . . 
H4 H 0.5661 0.7294 0.8337 0.041 Uiso 1 1 calc R . . 
C33 C 0.6522(2) 0.84130(15) 0.97649(16) 0.0252(8) Uani 1 1 d . . . 
N5 N 0.5245(2) 0.90565(13) 0.80116(15) 0.0373(8) Uani 1 1 d . . . 
H5 H 0.5545 0.9286 0.7784 0.045 Uiso 1 1 calc R . . 
C4 C 0.4249(3) 0.67003(15) 0.79647(17) 0.0318(9) Uani 1 1 d . . . 
N1 N 0.7420(2) 0.84437(11) 0.73606(13) 0.0241(7) Uani 1 1 d . . . 
C43 C 0.8528(3) 0.74698(15) 0.91833(16) 0.0286(9) Uani 1 1 d . . . 
C55 C 0.8794(3) 0.92910(15) 0.78441(16) 0.0270(9) Uani 1 1 d . . . 
C62 C 0.7886(3) 0.97539(19) 0.6386(2) 0.0592(14) Uani 1 1 d . . . 
H62A H 0.8474 0.9614 0.6613 0.089 Uiso 1 1 calc R . . 
H62B H 0.7724 1.0125 0.6527 0.089 Uiso 1 1 calc R . . 
H62C H 0.8014 0.9775 0.5969 0.089 Uiso 1 1 calc R . . 
C37 C 0.8890(3) 0.85946(15) 0.96082(16) 0.0273(9) Uani 1 1 d . . . 
C9 C 0.4690(3) 0.71882(15) 0.77195(18) 0.0312(9) Uani 1 1 d . . . 
C38 C 0.8851(3) 0.85457(17) 1.02255(17) 0.0359(10) Uani 1 1 d . . . 
H38 H 0.8370 0.8313 1.0380 0.043 Uiso 1 1 calc R . . 
C72 C 0.8815(3) 0.69329(18) 0.6874(2) 0.0512(12) Uani 1 1 d . . . 
H72A H 0.8723 0.6736 0.6498 0.077 Uiso 1 1 calc R . . 
H72B H 0.8947 0.6663 0.7192 0.077 Uiso 1 1 calc R . . 
H72C H 0.9372 0.7190 0.6864 0.077 Uiso 1 1 calc R . . 
C7 C 0.3647(3) 0.70234(17) 0.67994(18) 0.0358(10) Uani 1 1 d . . . 
H7 H 0.3440 0.7131 0.6410 0.043 Uiso 1 1 calc R . . 
C20 C 0.4029(3) 0.98425(17) 0.78298(19) 0.0411(11) Uani 1 1 d . . . 
C32 C 0.6208(3) 0.79942(16) 1.01579(17) 0.0311(9) Uani 1 1 d . . . 
C10 C 0.4747(3) 0.78844(17) 0.68372(18) 0.0371(10) Uani 1 1 d . . . 
H10 H 0.5373 0.7995 0.7064 0.044 Uiso 1 1 calc R . . 
C2 C 0.4557(3) 0.65103(17) 0.86037(19) 0.0417(11) Uani 1 1 d . . . 
H2 H 0.4725 0.6854 0.8838 0.050 Uiso 1 1 calc R . . 
C70 C 0.7856(3) 0.72696(16) 0.69831(19) 0.0361(10) Uani 1 1 d . . . 
H70 H 0.7943 0.7430 0.7388 0.043 Uiso 1 1 calc R . . 
C60 C 0.9753(3) 0.94975(16) 0.77552(17) 0.0339(10) Uani 1 1 d . . . 
H60 H 1.0257 0.9247 0.7663 0.041 Uiso 1 1 calc R . . 
C29 C 0.6203(3) 0.91267(18) 1.05021(18) 0.0388(10) Uani 1 1 d . . . 
H29 H 0.6190 0.9505 1.0619 0.047 Uiso 1 1 calc R . . 
C39 C 0.9523(3) 0.88408(19) 1.06115(18) 0.0464(12) Uani 1 1 d . . . 
H39 H 0.9491 0.8811 1.1024 0.056 Uiso 1 1 calc R . . 
C49 C 0.9545(3) 0.81972(15) 0.75709(17) 0.0280(9) Uani 1 1 d . . . 
C28 C 0.6505(3) 0.89901(16) 0.99345(17) 0.0302(9) Uani 1 1 d . . . 
C11 C 0.4978(3) 0.7811(2) 0.61833(19) 0.0520(13) Uani 1 1 d . . . 
H11A H 0.5385 0.7479 0.6145 0.078 Uiso 1 1 calc R . . 
H11B H 0.5335 0.8138 0.6056 0.078 Uiso 1 1 calc R . . 
H11C H 0.4361 0.7770 0.5938 0.078 Uiso 1 1 calc R . . 
C8 C 0.4366(3) 0.73511(16) 0.71270(18) 0.0318(9) Uani 1 1 d . . . 
C6 C 0.3239(3) 0.65475(17) 0.7035(2) 0.0417(11) Uani 1 1 d . . . 
H6 H 0.2769 0.6330 0.6808 0.050 Uiso 1 1 calc R . . 
C48 C 0.8013(3) 0.70367(17) 0.88611(18) 0.0392(10) Uani 1 1 d . . . 
H48 H 0.7431 0.7123 0.8624 0.047 Uiso 1 1 calc R . . 
C34 C 0.6201(3) 0.73698(16) 0.99958(18) 0.0342(10) Uani 1 1 d . . . 
H34 H 0.6296 0.7339 0.9566 0.041 Uiso 1 1 calc R . . 
C35 C 0.5205(3) 0.70791(18) 1.0111(2) 0.0475(12) Uani 1 1 d . . . 
H35A H 0.5082 0.7117 1.0527 0.071 Uiso 1 1 calc R . . 
H35B H 0.5243 0.6684 1.0010 0.071 Uiso 1 1 calc R . . 
H35C H 0.4668 0.7254 0.9868 0.071 Uiso 1 1 calc R . . 
C68 C 0.7671(3) 0.77588(16) 0.65466(17) 0.0323(9) Uani 1 1 d . . . 
C63 C 0.7009(3) 0.93537(17) 0.64619(19) 0.0417(11) Uani 1 1 d . . . 
H63 H 0.6872 0.9356 0.6887 0.050 Uiso 1 1 calc R . . 
C21 C 0.4339(3) 0.93249(16) 0.81263(19) 0.0356(10) Uani 1 1 d . . . 
C15 C 0.3974(3) 0.85512(17) 0.8902(2) 0.0424(11) Uani 1 1 d . . . 
H15 H 0.4681 0.8461 0.8854 0.051 Uiso 1 1 calc R . . 
C16 C 0.3717(3) 0.90930(17) 0.85533(19) 0.0384(10) Uani 1 1 d . . . 
C59 C 0.9960(3) 1.00755(17) 0.78042(18) 0.0407(11) Uani 1 1 d . . . 
H59 H 1.0600 1.0209 0.7742 0.049 Uiso 1 1 calc R . . 
C58 C 0.9229(3) 1.04476(17) 0.79434(19) 0.0429(11) Uani 1 1 d . . . 
H58 H 0.9368 1.0834 0.7962 0.051 Uiso 1 1 calc R . . 
C26 C 0.6791(3) 0.94758(16) 0.95274(18) 0.0377(10) Uani 1 1 d . . . 
H26 H 0.7044 0.9310 0.9166 0.045 Uiso 1 1 calc R . . 
C41 C 1.0290(3) 0.92302(19) 0.9769(2) 0.0479(12) Uani 1 1 d . . . 
H41 H 1.0774 0.9463 0.9617 0.057 Uiso 1 1 calc R . . 
C14 C 0.3845(3) 0.8614(2) 0.9580(2) 0.0536(12) Uani 1 1 d . . . 
H14A H 0.3145 0.8660 0.9643 0.080 Uiso 1 1 calc R . . 
H14B H 0.4212 0.8940 0.9733 0.080 Uiso 1 1 calc R . . 
H14C H 0.4097 0.8280 0.9787 0.080 Uiso 1 1 calc R . . 
C44 C 0.9390(3) 0.73264(17) 0.95287(18) 0.0382(10) Uani 1 1 d . . . 
H44 H 0.9751 0.7607 0.9742 0.046 Uiso 1 1 calc R . . 
C42 C 0.9626(3) 0.89381(16) 0.93814(18) 0.0364(10) Uani 1 1 d . . . 
H42 H 0.9668 0.8969 0.8969 0.044 Uiso 1 1 calc R . . 
C50 C 1.0052(3) 0.78212(17) 0.7967(2) 0.0396(10) Uani 1 1 d . . . 
H50 H 0.9786 0.7731 0.8328 0.048 Uiso 1 1 calc R . . 
C5 C 0.3540(3) 0.63968(16) 0.76207(19) 0.0378(10) Uani 1 1 d . . . 
H5A H 0.3253 0.6079 0.7786 0.045 Uiso 1 1 calc R . . 
C36 C 0.7076(3) 0.70577(18) 1.0341(2) 0.0487(12) Uani 1 1 d . . . 
H36A H 0.7703 0.7215 1.0234 0.073 Uiso 1 1 calc R . . 
H36B H 0.7050 0.6662 1.0241 0.073 Uiso 1 1 calc R . . 
H36C H 0.7022 0.7102 1.0765 0.073 Uiso 1 1 calc R . . 
C19 C 0.3147(3) 1.00958(19) 0.7973(2) 0.0489(12) Uani 1 1 d . . . 
H19 H 0.2951 1.0434 0.7784 0.059 Uiso 1 1 calc R . . 
C57 C 0.8292(3) 1.02555(16) 0.80563(19) 0.0396(10) Uani 1 1 d . . . 
H57 H 0.7805 1.0508 0.8169 0.047 Uiso 1 1 calc R . . 
C71 C 0.6958(3) 0.68669(18) 0.6966(2) 0.0522(13) Uani 1 1 d . . . 
H71A H 0.6375 0.7070 0.7076 0.078 Uiso 1 1 calc R . . 
H71B H 0.7100 0.6561 0.7243 0.078 Uiso 1 1 calc R . . 
H71C H 0.6835 0.6717 0.6568 0.078 Uiso 1 1 calc R . . 
C56 C 0.8076(3) 0.96800(16) 0.80018(18) 0.0361(10) Uani 1 1 d . . . 
H56 H 0.7436 0.9552 0.8072 0.043 Uiso 1 1 calc R . . 
C67 C 0.7713(3) 0.76533(19) 0.5939(2) 0.0457(11) Uani 1 1 d . . . 
H67 H 0.7851 0.7287 0.5814 0.055 Uiso 1 1 calc R . . 
C18 C 0.2539(4) 0.9863(2) 0.8389(2) 0.0562(13) Uani 1 1 d . . . 
H18 H 0.1947 1.0042 0.8478 0.067 Uiso 1 1 calc R . . 
C40 C 1.0241(3) 0.9181(2) 1.0377(2) 0.0528(13) Uani 1 1 d . . . 
H40 H 1.0697 0.9378 1.0635 0.063 Uiso 1 1 calc R . . 
C30 C 0.5922(3) 0.87130(19) 1.08922(18) 0.0419(11) Uani 1 1 d . . . 
H30 H 0.5741 0.8811 1.1273 0.050 Uiso 1 1 calc R . . 
C27 C 0.5883(3) 0.98396(18) 0.9336(2) 0.0502(12) Uani 1 1 d . . . 
H27A H 0.5358 0.9603 0.9156 0.075 Uiso 1 1 calc R . . 
H27B H 0.6068 1.0119 0.9051 0.075 Uiso 1 1 calc R . . 
H27C H 0.5649 1.0027 0.9681 0.075 Uiso 1 1 calc R . . 
C12 C 0.4002(3) 0.83709(17) 0.6883(2) 0.0522(12) Uani 1 1 d . . . 
H12A H 0.3404 0.8292 0.6632 0.078 Uiso 1 1 calc R . . 
H12B H 0.4299 0.8717 0.6754 0.078 Uiso 1 1 calc R . . 
H12C H 0.3836 0.8410 0.7291 0.078 Uiso 1 1 calc R . . 
C25 C 0.7618(3) 0.98608(17) 0.9822(2) 0.0519(12) Uani 1 1 d . . . 
H25A H 0.7791 1.0147 0.9542 0.078 Uiso 1 1 calc R . . 
H25B H 0.8202 0.9637 0.9938 0.078 Uiso 1 1 calc R . . 
H25C H 0.7378 1.0039 1.0171 0.078 Uiso 1 1 calc R . . 
C64 C 0.7265(3) 0.87477(17) 0.62951(17) 0.0342(10) Uani 1 1 d . . . 
C46 C 0.9208(4) 0.63557(19) 0.9250(2) 0.0565(13) Uani 1 1 d . . . 
H46 H 0.9431 0.5982 0.9277 0.068 Uiso 1 1 calc R . . 
C22 C 0.4661(3) 1.01164(18) 0.7382(2) 0.0495(12) Uani 1 1 d . . . 
H22 H 0.4888 0.9815 0.7122 0.059 Uiso 1 1 calc R . . 
C31 C 0.5911(3) 0.81570(18) 1.07150(17) 0.0385(10) Uani 1 1 d . . . 
H31 H 0.5699 0.7881 1.0975 0.046 Uiso 1 1 calc R . . 
C65 C 0.7336(3) 0.8610(2) 0.56926(19) 0.0463(11) Uani 1 1 d . . . 
H65 H 0.7230 0.8892 0.5404 0.056 Uiso 1 1 calc R . . 
C66 C 0.7556(3) 0.8073(2) 0.5515(2) 0.0518(12) Uani 1 1 d . . . 
H66 H 0.7600 0.7991 0.5111 0.062 Uiso 1 1 calc R . . 
C45 C 0.9725(4) 0.67700(19) 0.9562(2) 0.0535(13) Uani 1 1 d . . . 
H45 H 1.0305 0.6680 0.9799 0.064 Uiso 1 1 calc R . . 
C51 C 1.0954(3) 0.7580(2) 0.7824(2) 0.0531(13) Uani 1 1 d . . . 
H51 H 1.1281 0.7321 0.8085 0.064 Uiso 1 1 calc R . . 
C13 C 0.3344(4) 0.8059(2) 0.8655(2) 0.0627(14) Uani 1 1 d . . . 
H13A H 0.2654 0.8120 0.8732 0.094 Uiso 1 1 calc R . . 
H13B H 0.3579 0.7713 0.8844 0.094 Uiso 1 1 calc R . . 
H13C H 0.3399 0.8031 0.8230 0.094 Uiso 1 1 calc R . . 
C17 C 0.2827(3) 0.93650(19) 0.8665(2) 0.0460(11) Uani 1 1 d . . . 
H17 H 0.2413 0.9203 0.8935 0.055 Uiso 1 1 calc R . . 
C53 C 1.0870(3) 0.8090(2) 0.6909(2) 0.0497(12) Uani 1 1 d . . . 
H53 H 1.1153 0.8185 0.6554 0.060 Uiso 1 1 calc R . . 
C52 C 1.1360(3) 0.7721(2) 0.7303(2) 0.0535(13) Uani 1 1 d . . . 
H52 H 1.1973 0.7565 0.7214 0.064 Uiso 1 1 calc R . . 
C1 C 0.5510(4) 0.6150(2) 0.8615(2) 0.0652(15) Uani 1 1 d . . . 
H1A H 0.5359 0.5792 0.8423 0.098 Uiso 1 1 calc R . . 
H1B H 0.5760 0.6086 0.9023 0.098 Uiso 1 1 calc R . . 
H1C H 0.6010 0.6345 0.8405 0.098 Uiso 1 1 calc R . . 
C47 C 0.8353(4) 0.64874(18) 0.8891(2) 0.0523(13) Uani 1 1 d . . . 
H47 H 0.8010 0.6204 0.8670 0.063 Uiso 1 1 calc R . . 
C61 C 0.6059(3) 0.9567(2) 0.6100(2) 0.0615(14) Uani 1 1 d . . . 
H61A H 0.6181 0.9585 0.5683 0.092 Uiso 1 1 calc R . . 
H61B H 0.5890 0.9938 0.6238 0.092 Uiso 1 1 calc R . . 
H61C H 0.5513 0.9311 0.6154 0.092 Uiso 1 1 calc R . . 
C3 C 0.3728(4) 0.6200(2) 0.8917(2) 0.0657(15) Uani 1 1 d . . . 
H3A H 0.3130 0.6428 0.8895 0.098 Uiso 1 1 calc R . . 
H3B H 0.3949 0.6134 0.9329 0.098 Uiso 1 1 calc R . . 
H3C H 0.3586 0.5843 0.8721 0.098 Uiso 1 1 calc R . . 
C23 C 0.4119(4) 1.0561(2) 0.6977(3) 0.0819(18) Uani 1 1 d . . . 
H23A H 0.3552 1.0388 0.6757 0.123 Uiso 1 1 calc R . . 
H23B H 0.4572 1.0707 0.6700 0.123 Uiso 1 1 calc R . . 
H23C H 0.3892 1.0865 0.7218 0.123 Uiso 1 1 calc R . . 
C24 C 0.5596(4) 1.0394(2) 0.7685(2) 0.0680(15) Uani 1 1 d . . . 
H24A H 0.5404 1.0721 0.7907 0.102 Uiso 1 1 calc R . . 
H24B H 0.6035 1.0509 0.7386 0.102 Uiso 1 1 calc R . . 
H24C H 0.5937 1.0128 0.7954 0.102 Uiso 1 1 calc R . . 
C73 C 0.6297(5) 0.5404(3) 0.0242(3) 0.102(2) Uiso 1 1 d . . . 
H73 H 0.5999 0.5363 -0.0145 0.123 Uiso 1 1 calc R . . 
C74 C 0.7294(5) 0.5425(3) 0.0319(3) 0.102(2) Uiso 1 1 d . . . 
H74 H 0.7682 0.5404 -0.0009 0.122 Uiso 1 1 calc R . . 
C78 C 0.5706(6) 0.5439(3) 0.0696(3) 0.104(2) Uiso 1 1 d . . . 
H78 H 0.5011 0.5434 0.0625 0.125 Uiso 1 1 calc R . . 
C76 C 0.7127(5) 0.5502(3) 0.1366(3) 0.103(2) Uiso 1 1 d . . . 
H76 H 0.7408 0.5533 0.1758 0.123 Uiso 1 1 calc R . . 
C77 C 0.6126(5) 0.5480(3) 0.1251(3) 0.099(2) Uiso 1 1 d . . . 
H77 H 0.5716 0.5495 0.1569 0.119 Uiso 1 1 calc R . . 
C75 C 0.7742(5) 0.5477(3) 0.0883(3) 0.107(2) Uiso 1 1 d . . . 
H75 H 0.8438 0.5496 0.0947 0.128 Uiso 1 1 calc R . . 
 
loop_ 
 _atom_site_aniso_label 
 _atom_site_aniso_U_11 
 _atom_site_aniso_U_22 
 _atom_site_aniso_U_33 
 _atom_site_aniso_U_23 
 _atom_site_aniso_U_13 
 _atom_site_aniso_U_12 
Y1 0.02221(19) 0.0242(2) 0.0264(2) -0.00232(17) 0.00335(14) -0.00169(16) 
P2 0.0232(5) 0.0263(5) 0.0236(5) -0.0014(4) 0.0035(4) -0.0024(4) 
P1 0.0232(5) 0.0244(5) 0.0249(5) -0.0012(4) 0.0059(4) -0.0011(4) 
N2 0.0226(16) 0.0316(17) 0.0244(17) 0.0031(14) 0.0054(13) -0.0004(13) 
N3 0.0221(16) 0.0273(17) 0.0223(17) -0.0018(14) 0.0043(13) -0.0036(13) 
C54 0.033(2) 0.041(2) 0.039(3) -0.009(2) 0.0118(19) -0.0037(19) 
C69 0.0231(19) 0.033(2) 0.025(2) -0.0016(18) 0.0045(16) -0.0023(17) 
N4 0.0364(19) 0.0291(18) 0.036(2) 0.0017(15) -0.0032(16) -0.0075(15) 
C33 0.0163(18) 0.037(2) 0.022(2) -0.0042(17) 0.0036(15) -0.0058(16) 
N5 0.0312(19) 0.0330(19) 0.048(2) 0.0018(16) 0.0063(16) 0.0020(15) 
C4 0.028(2) 0.030(2) 0.038(2) -0.0048(19) 0.0060(18) -0.0051(18) 
N1 0.0252(16) 0.0253(17) 0.0224(17) -0.0004(13) 0.0058(13) -0.0007(13) 
C43 0.030(2) 0.032(2) 0.025(2) 0.0009(18) 0.0095(17) -0.0026(17) 
C55 0.026(2) 0.030(2) 0.025(2) 0.0032(17) 0.0011(17) -0.0027(16) 
C62 0.065(3) 0.047(3) 0.066(4) 0.018(3) 0.000(3) -0.009(2) 
C37 0.025(2) 0.029(2) 0.028(2) 0.0001(17) 0.0022(17) -0.0004(16) 
C9 0.027(2) 0.030(2) 0.037(2) -0.0081(19) 0.0041(18) -0.0020(17) 
C38 0.036(2) 0.043(2) 0.029(2) -0.001(2) 0.0024(19) -0.0095(19) 
C72 0.046(3) 0.035(2) 0.073(4) -0.005(2) 0.011(2) 0.007(2) 
C7 0.033(2) 0.041(3) 0.033(2) -0.010(2) 0.0007(19) -0.0012(19) 
C20 0.037(3) 0.038(3) 0.047(3) -0.006(2) -0.006(2) 0.005(2) 
C32 0.026(2) 0.039(2) 0.030(2) 0.0000(19) 0.0074(18) -0.0037(18) 
C10 0.035(2) 0.043(3) 0.033(2) -0.003(2) 0.0000(19) -0.0086(19) 
C2 0.052(3) 0.037(2) 0.036(3) 0.003(2) 0.002(2) -0.012(2) 
C70 0.038(2) 0.032(2) 0.039(3) -0.0110(19) 0.009(2) -0.0001(19) 
C60 0.027(2) 0.034(2) 0.041(3) 0.0007(19) 0.0032(18) -0.0031(17) 
C29 0.036(2) 0.042(3) 0.039(3) -0.015(2) 0.007(2) -0.002(2) 
C39 0.049(3) 0.066(3) 0.023(2) -0.008(2) -0.002(2) -0.020(2) 
C49 0.025(2) 0.030(2) 0.030(2) -0.0059(18) 0.0076(17) -0.0027(16) 
C28 0.022(2) 0.037(2) 0.032(2) -0.0063(19) 0.0065(17) -0.0034(17) 
C11 0.046(3) 0.074(3) 0.035(3) 0.006(2) -0.003(2) -0.018(2) 
C8 0.028(2) 0.032(2) 0.037(3) -0.0037(19) 0.0061(18) 0.0015(17) 
C6 0.038(2) 0.034(2) 0.052(3) -0.014(2) -0.003(2) -0.0093(19) 
C48 0.040(2) 0.038(3) 0.039(3) -0.002(2) 0.002(2) 0.001(2) 
C34 0.040(2) 0.037(2) 0.026(2) 0.0022(19) 0.0080(19) -0.0055(19) 
C35 0.049(3) 0.047(3) 0.047(3) 0.005(2) 0.003(2) -0.011(2) 
C68 0.030(2) 0.038(2) 0.029(2) -0.0068(19) 0.0069(18) -0.0017(18) 
C63 0.048(3) 0.040(3) 0.038(3) 0.011(2) 0.004(2) 0.000(2) 
C21 0.027(2) 0.034(2) 0.044(3) -0.013(2) -0.001(2) 0.0037(18) 
C15 0.029(2) 0.041(3) 0.058(3) -0.005(2) 0.011(2) 0.0047(19) 
C16 0.030(2) 0.040(3) 0.045(3) -0.013(2) 0.001(2) 0.0017(19) 
C59 0.035(2) 0.039(3) 0.047(3) 0.005(2) -0.006(2) -0.017(2) 
C58 0.051(3) 0.027(2) 0.049(3) -0.002(2) -0.007(2) -0.005(2) 
C26 0.044(3) 0.032(2) 0.039(3) -0.010(2) 0.016(2) -0.0086(19) 
C41 0.045(3) 0.057(3) 0.042(3) -0.002(2) 0.005(2) -0.027(2) 
C14 0.049(3) 0.059(3) 0.053(3) -0.001(3) 0.008(2) 0.005(2) 
C44 0.043(3) 0.041(3) 0.031(2) 0.000(2) 0.003(2) 0.006(2) 
C42 0.036(2) 0.046(3) 0.027(2) -0.007(2) 0.0024(19) -0.009(2) 
C50 0.032(2) 0.041(3) 0.047(3) 0.001(2) 0.010(2) 0.0065(19) 
C5 0.035(2) 0.031(2) 0.047(3) -0.001(2) 0.000(2) -0.0065(19) 
C36 0.048(3) 0.051(3) 0.049(3) 0.011(2) 0.012(2) 0.000(2) 
C19 0.047(3) 0.045(3) 0.054(3) -0.005(2) -0.007(2) 0.018(2) 
C57 0.041(3) 0.030(2) 0.048(3) -0.008(2) 0.002(2) -0.0046(19) 
C71 0.053(3) 0.039(3) 0.066(3) -0.006(2) 0.012(3) -0.006(2) 
C56 0.032(2) 0.033(2) 0.044(3) -0.001(2) 0.0062(19) -0.0046(18) 
C67 0.044(3) 0.051(3) 0.044(3) -0.012(2) 0.012(2) 0.001(2) 
C18 0.041(3) 0.070(4) 0.057(3) -0.012(3) -0.001(2) 0.023(3) 
C40 0.046(3) 0.070(3) 0.041(3) -0.011(2) -0.003(2) -0.029(2) 
C30 0.041(3) 0.060(3) 0.026(2) -0.010(2) 0.013(2) 0.003(2) 
C27 0.055(3) 0.042(3) 0.054(3) -0.002(2) 0.004(2) -0.005(2) 
C12 0.052(3) 0.040(3) 0.063(3) 0.007(2) -0.002(2) -0.004(2) 
C25 0.045(3) 0.039(3) 0.073(4) -0.016(2) 0.013(2) -0.009(2) 
C64 0.029(2) 0.047(3) 0.027(2) 0.003(2) 0.0035(18) -0.0025(19) 
C46 0.067(3) 0.035(3) 0.069(4) 0.000(3) 0.011(3) 0.017(2) 
C22 0.049(3) 0.041(3) 0.058(3) 0.007(2) 0.005(2) 0.009(2) 
C31 0.041(2) 0.052(3) 0.024(2) 0.003(2) 0.0136(19) -0.005(2) 
C65 0.043(3) 0.063(3) 0.033(3) 0.012(2) 0.005(2) 0.005(2) 
C66 0.053(3) 0.080(4) 0.023(3) -0.007(3) 0.009(2) 0.001(3) 
C45 0.058(3) 0.055(3) 0.048(3) 0.004(2) 0.002(2) 0.026(3) 
C51 0.033(3) 0.059(3) 0.067(4) -0.003(3) 0.003(2) 0.010(2) 
C13 0.062(3) 0.052(3) 0.075(4) -0.009(3) 0.008(3) -0.006(3) 
C17 0.030(2) 0.057(3) 0.052(3) -0.008(2) 0.003(2) 0.005(2) 
C53 0.046(3) 0.059(3) 0.048(3) -0.015(3) 0.024(2) -0.006(2) 
C52 0.034(3) 0.061(3) 0.068(4) -0.020(3) 0.020(3) 0.005(2) 
C1 0.073(4) 0.058(3) 0.062(4) 0.008(3) -0.011(3) 0.009(3) 
C47 0.062(3) 0.027(2) 0.068(4) -0.006(2) 0.004(3) 0.001(2) 
C61 0.060(3) 0.064(3) 0.061(3) 0.020(3) 0.004(3) 0.011(3) 
C3 0.081(4) 0.070(4) 0.045(3) 0.008(3) 0.004(3) -0.032(3) 
C23 0.076(4) 0.078(4) 0.093(5) 0.035(3) 0.015(3) 0.021(3) 
C24 0.064(3) 0.046(3) 0.094(4) 0.004(3) 0.014(3) -0.002(3) 
 
_geom_special_details 
; 
 All esds (except the esd in the dihedral angle between two l.s. planes) 
 are estimated using the full covariance matrix.  The cell esds are taken 
 into account individually in the estimation of esds in distances, angles 
 and torsion angles; correlations between esds in cell parameters are only 
 used when they are defined by crystal symmetry.  An approximate (isotropic) 
 treatment of cell esds is used for estimating esds involving l.s. planes. 
; 
 
loop_ 
 _geom_bond_atom_site_label_1 
 _geom_bond_atom_site_label_2 
 _geom_bond_distance 
 _geom_bond_site_symmetry_2 
 _geom_bond_publ_flag 
Y1 N5 2.206(3) . ? 
Y1 N4 2.211(3) . ? 
Y1 N3 2.420(3) . ? 
Y1 N1 2.445(3) . ? 
Y1 N2 2.490(3) . ? 
P2 N2 1.588(3) . ? 
P2 N3 1.610(3) . ? 
P2 C37 1.802(4) . ? 
P2 C43 1.819(4) . ? 
P1 N2 1.579(3) . ? 
P1 N1 1.609(3) . ? 
P1 C49 1.795(4) . ? 
P1 C55 1.818(4) . ? 
N3 C33 1.445(4) . ? 
C54 C53 1.386(5) . ? 
C54 C49 1.388(5) . ? 
C69 C64 1.409(5) . ? 
C69 C68 1.420(5) . ? 
C69 N1 1.445(4) . ? 
N4 C9 1.401(4) . ? 
C33 C32 1.405(5) . ? 
C33 C28 1.412(5) . ? 
N5 C21 1.405(5) . ? 
C4 C5 1.374(5) . ? 
C4 C9 1.420(5) . ? 
C4 C2 1.524(5) . ? 
C43 C44 1.379(5) . ? 
C43 C48 1.400(5) . ? 
C55 C56 1.390(5) . ? 
C55 C60 1.396(5) . ? 
C62 C63 1.523(5) . ? 
C37 C38 1.389(5) . ? 
C37 C42 1.396(5) . ? 
C9 C8 1.416(5) . ? 
C38 C39 1.385(5) . ? 
C72 C70 1.540(5) . ? 
C7 C6 1.369(5) . ? 
C7 C8 1.396(5) . ? 
C20 C19 1.379(5) . ? 
C20 C21 1.434(5) . ? 
C20 C22 1.501(6) . ? 
C32 C31 1.388(5) . ? 
C32 C34 1.515(5) . ? 
C10 C8 1.518(5) . ? 
C10 C12 1.525(5) . ? 
C10 C11 1.526(5) . ? 
C2 C1 1.528(6) . ? 
C2 C3 1.538(6) . ? 
C70 C68 1.518(5) . ? 
C70 C71 1.526(5) . ? 
C60 C59 1.392(5) . ? 
C29 C30 1.378(5) . ? 
C29 C28 1.397(5) . ? 
C39 C40 1.381(6) . ? 
C49 C50 1.392(5) . ? 
C28 C26 1.528(5) . ? 
C6 C5 1.386(6) . ? 
C48 C47 1.372(5) . ? 
C34 C35 1.533(5) . ? 
C34 C36 1.539(5) . ? 
C68 C67 1.386(5) . ? 
C63 C64 1.521(5) . ? 
C63 C61 1.536(5) . ? 
C21 C16 1.419(6) . ? 
C15 C13 1.513(6) . ? 
C15 C16 1.522(6) . ? 
C15 C14 1.545(6) . ? 
C16 C17 1.388(5) . ? 
C59 C58 1.364(5) . ? 
C58 C57 1.370(5) . ? 
C26 C27 1.520(5) . ? 
C26 C25 1.539(5) . ? 
C41 C40 1.370(6) . ? 
C41 C42 1.377(5) . ? 
C44 C45 1.385(5) . ? 
C50 C51 1.389(5) . ? 
C19 C18 1.391(6) . ? 
C57 C56 1.390(5) . ? 
C67 C66 1.374(6) . ? 
C18 C17 1.366(6) . ? 
C30 C31 1.368(6) . ? 
C64 C65 1.395(5) . ? 
C46 C45 1.358(6) . ? 
C46 C47 1.380(6) . ? 
C22 C24 1.522(6) . ? 
C22 C23 1.531(6) . ? 
C65 C66 1.364(6) . ? 
C51 C52 1.362(6) . ? 
C53 C52 1.370(6) . ? 
C73 C74 1.330(8) . ? 
C73 C78 1.333(8) . ? 
C74 C75 1.360(8) . ? 
C78 C77 1.326(8) . ? 
C76 C77 1.342(8) . ? 
C76 C75 1.405(9) . ? 
 
loop_ 
 _geom_angle_atom_site_label_1 
 _geom_angle_atom_site_label_2 
 _geom_angle_atom_site_label_3 
 _geom_angle 
 _geom_angle_site_symmetry_1 
 _geom_angle_site_symmetry_3 
 _geom_angle_publ_flag 
N5 Y1 N4 111.84(12) . . ? 
N5 Y1 N3 109.61(11) . . ? 
N4 Y1 N3 100.24(10) . . ? 
N5 Y1 N1 102.84(11) . . ? 
N4 Y1 N1 111.84(10) . . ? 
N3 Y1 N1 120.71(9) . . ? 
N5 Y1 N2 126.22(10) . . ? 
N4 Y1 N2 121.90(10) . . ? 
N3 Y1 N2 60.63(9) . . ? 
N1 Y1 N2 60.12(9) . . ? 
N2 P2 N3 101.68(15) . . ? 
N2 P2 C37 114.43(17) . . ? 
N3 P2 C37 116.03(16) . . ? 
N2 P2 C43 106.28(16) . . ? 
N3 P2 C43 114.87(16) . . ? 
C37 P2 C43 103.53(17) . . ? 
N2 P1 N1 101.68(15) . . ? 
N2 P1 C49 113.25(17) . . ? 
N1 P1 C49 116.61(16) . . ? 
N2 P1 C55 107.87(16) . . ? 
N1 P1 C55 113.45(15) . . ? 
C49 P1 C55 103.98(17) . . ? 
P1 N2 P2 165.5(2) . . ? 
P1 N2 Y1 97.45(13) . . ? 
P2 N2 Y1 96.76(13) . . ? 
C33 N3 P2 121.0(2) . . ? 
C33 N3 Y1 137.4(2) . . ? 
P2 N3 Y1 98.87(13) . . ? 
C53 C54 C49 119.9(4) . . ? 
C64 C69 C68 119.8(3) . . ? 
C64 C69 N1 120.8(3) . . ? 
C68 C69 N1 119.4(3) . . ? 
C9 N4 Y1 147.4(3) . . ? 
C32 C33 C28 119.8(3) . . ? 
C32 C33 N3 120.8(3) . . ? 
C28 C33 N3 119.4(3) . . ? 
C21 N5 Y1 148.8(3) . . ? 
C5 C4 C9 119.5(4) . . ? 
C5 C4 C2 119.9(4) . . ? 
C9 C4 C2 120.5(3) . . ? 
C69 N1 P1 121.2(2) . . ? 
C69 N1 Y1 138.2(2) . . ? 
P1 N1 Y1 98.39(13) . . ? 
C44 C43 C48 117.9(4) . . ? 
C44 C43 P2 123.8(3) . . ? 
C48 C43 P2 118.4(3) . . ? 
C56 C55 C60 117.5(3) . . ? 
C56 C55 P1 117.9(3) . . ? 
C60 C55 P1 124.5(3) . . ? 
C38 C37 C42 119.2(3) . . ? 
C38 C37 P2 120.8(3) . . ? 
C42 C37 P2 119.9(3) . . ? 
N4 C9 C8 119.9(3) . . ? 
N4 C9 C4 121.9(3) . . ? 
C8 C9 C4 118.3(3) . . ? 
C39 C38 C37 120.5(4) . . ? 
C6 C7 C8 121.9(4) . . ? 
C19 C20 C21 118.9(4) . . ? 
C19 C20 C22 120.0(4) . . ? 
C21 C20 C22 121.1(4) . . ? 
C31 C32 C33 119.0(4) . . ? 
C31 C32 C34 119.1(3) . . ? 
C33 C32 C34 121.9(3) . . ? 
C8 C10 C12 110.7(3) . . ? 
C8 C10 C11 114.4(3) . . ? 
C12 C10 C11 109.2(4) . . ? 
C4 C2 C1 110.2(4) . . ? 
C4 C2 C3 114.4(4) . . ? 
C1 C2 C3 110.7(4) . . ? 
C68 C70 C71 111.5(3) . . ? 
C68 C70 C72 112.7(3) . . ? 
C71 C70 C72 109.6(3) . . ? 
C59 C60 C55 120.5(4) . . ? 
C30 C29 C28 121.5(4) . . ? 
C40 C39 C38 119.3(4) . . ? 
C54 C49 C50 118.9(4) . . ? 
C54 C49 P1 121.2(3) . . ? 
C50 C49 P1 119.8(3) . . ? 
C29 C28 C33 118.5(4) . . ? 
C29 C28 C26 118.0(3) . . ? 
C33 C28 C26 123.5(3) . . ? 
C7 C8 C9 119.4(4) . . ? 
C7 C8 C10 118.2(4) . . ? 
C9 C8 C10 122.3(3) . . ? 
C7 C6 C5 118.5(4) . . ? 
C47 C48 C43 121.0(4) . . ? 
C32 C34 C35 112.6(3) . . ? 
C32 C34 C36 110.7(3) . . ? 
C35 C34 C36 109.7(3) . . ? 
C67 C68 C69 118.2(4) . . ? 
C67 C68 C70 118.5(4) . . ? 
C69 C68 C70 123.3(3) . . ? 
C64 C63 C62 111.4(4) . . ? 
C64 C63 C61 111.7(4) . . ? 
C62 C63 C61 110.5(3) . . ? 
N5 C21 C16 120.2(4) . . ? 
N5 C21 C20 121.4(4) . . ? 
C16 C21 C20 118.4(4) . . ? 
C13 C15 C16 110.9(4) . . ? 
C13 C15 C14 109.5(4) . . ? 
C16 C15 C14 112.7(3) . . ? 
C17 C16 C21 119.6(4) . . ? 
C17 C16 C15 117.3(4) . . ? 
C21 C16 C15 123.2(4) . . ? 
C58 C59 C60 120.4(4) . . ? 
C59 C58 C57 120.4(4) . . ? 
C27 C26 C28 111.1(3) . . ? 
C27 C26 C25 108.7(3) . . ? 
C28 C26 C25 112.9(3) . . ? 
C40 C41 C42 120.4(4) . . ? 
C43 C44 C45 121.0(4) . . ? 
C41 C42 C37 119.9(4) . . ? 
C51 C50 C49 120.2(4) . . ? 
C4 C5 C6 122.3(4) . . ? 
C20 C19 C18 122.3(4) . . ? 
C58 C57 C56 119.5(4) . . ? 
C57 C56 C55 121.5(4) . . ? 
C66 C67 C68 122.1(4) . . ? 
C17 C18 C19 118.8(4) . . ? 
C41 C40 C39 120.7(4) . . ? 
C31 C30 C29 119.4(4) . . ? 
C65 C64 C69 118.5(4) . . ? 
C65 C64 C63 119.2(4) . . ? 
C69 C64 C63 122.3(3) . . ? 
C45 C46 C47 120.2(4) . . ? 
C20 C22 C24 111.7(4) . . ? 
C20 C22 C23 115.1(4) . . ? 
C24 C22 C23 107.8(4) . . ? 
C30 C31 C32 121.8(4) . . ? 
C66 C65 C64 121.8(4) . . ? 
C65 C66 C67 119.5(4) . . ? 
C46 C45 C44 120.2(4) . . ? 
C52 C51 C50 120.2(4) . . ? 
C18 C17 C16 122.1(4) . . ? 
C52 C53 C54 120.5(4) . . ? 
C51 C52 C53 120.3(4) . . ? 
C48 C47 C46 119.8(4) . . ? 
C74 C73 C78 122.7(8) . . ? 
C73 C74 C75 119.4(7) . . ? 
C77 C78 C73 119.0(7) . . ? 
C77 C76 C75 118.6(7) . . ? 
C78 C77 C76 121.9(7) . . ? 
C74 C75 C76 118.4(7) . . ? 
 
_diffrn_measured_fraction_theta_max    0.998 
_diffrn_reflns_theta_full              25.07 
_diffrn_measured_fraction_theta_full   0.998 
_refine_diff_density_max    0.859 
_refine_diff_density_min   -0.403 
_refine_diff_density_rms    0.072 
